# Supplementary material for: Construction of a novel pyrene-based two-dimensional supramolecular organic framework and the selective regulation of reactive oxygen species for photocatalysis
Source: Royal Society of Chemistry journal article supplement (doi:10.1039/d3ta07403j), 2024-01-01
Supplement: d3ta07403j1.pdf [file d3ta07403j1.pdf]

Electronic Supplementary Information for

**Construction of novel pyrene-based two-dimensional  
supramolecular organic framework and its selective regulation of  
reactive oxygen species for photocatalysis**

Man Jiang,<sup>‡a</sup> Ying Wang,<sup>‡b</sup> Hui Liu,<sup>b</sup> Shengsheng Yu,<sup>b</sup> Kai-Kai Niu,<sup>\*b</sup> Ling-Bao  
Xing<sup>\*b</sup>

<sup>a</sup>School of Resources and Environmental Engineering, Shandong University of  
Technology, Zibo, Shandong 255000, P. R. China

<sup>b</sup>School of Chemistry and Chemical Engineering, Shandong University of Technology,  
Zibo 255000, P. R. China

\*Corresponding authors: Tel./fax: +86 533 2781664. E-mail: [kkai007@126.com](mailto:kkai007@126.com);  
[lbxing@sdut.edu.cn](mailto:lbxing@sdut.edu.cn).

<sup>‡</sup>These authors contributed equally to this work.

## **Experimental**

**Materials:** Unless specifically mentioned, all chemicals are commercially available and were used as received.

**Characterizations:**  $^1\text{H}$  NMR spectra was recorded on a Bruker Advance 400 spectrometer (400 MHz) at 298 K, and the chemical shifts ( $\delta$ ) were expressed in ppm and J values were given in Hz. UV-vis spectra were obtained on a Shimadzu UV-1601PC spectrophotometer in a quartz cell (light path 10 mm) at 298 K. Steady-state fluorescence measurements were carried out using a Hitachi 4500 spectrophotometer. Dynamic light scattering (DLS) and zeta potential are measured on Malvern Zetasizer Nano ZS90. Transmission electron microscopy (TEM) images were obtained on a JEM 2100 operating at 120 kV. Samples for TEM measurements were prepared by dropping the mixture aqueous solution on carbon-coated copper grid (300 mesh) and drying by slow evaporation. The photocatalytic reaction was performed on WATTCAS Parallel Photocatalytic Reactor (WP-TEC-HSL) with 10W COB LED.

**General procedure for the aerobic oxidation of sulfides:** Sulfides (0.1 mmol, 14  $\mu\text{L}$ ) was added in the newly produced solution of SOF (1.0 mol%, 3 mL,  $[\text{Pmvp}] = 5.0 \times 10^{-5}$  M,  $[\text{CB}[8]] = 1.0 \times 10^{-4}$  M). The reaction was irradiated with blue LED (10 W, 450 nm - 455 nm) at room temperature under the ambient air condition for 2 h. Then the mixture was extracted with dichloromethane, and the combined organic layer was dried with anhydrous  $\text{Na}_2\text{SO}_4$ . Then the organic solvent was removed in vacuo and purified by flash column chromatography with petroleum ether/ethyl acetate to afford the products.

**General procedure for the oxidative hydroxylation of arylboronic acid:** arylboronic acid (0.1 mmol) was added in the newly produced solution of SOF (1.0 mol%, 3 mL,  $[\text{Pmvp}] = 5.0 \times 10^{-5}$  M,  $[\text{CB}[8]] = 1.0 \times 10^{-4}$  M). Then *N,N*-Diisopropylethylamine (0.3 mmol, 53  $\mu\text{L}$ ) was added and the mixture was irradiated with blue LED (10 W, 450 nm - 455 nm) at room temperature under the ambient air condition for 10 h. Then the solvent was removed in vacuo and purified by flash column chromatography with petroleum ether/ethyl acetate to afford the products.

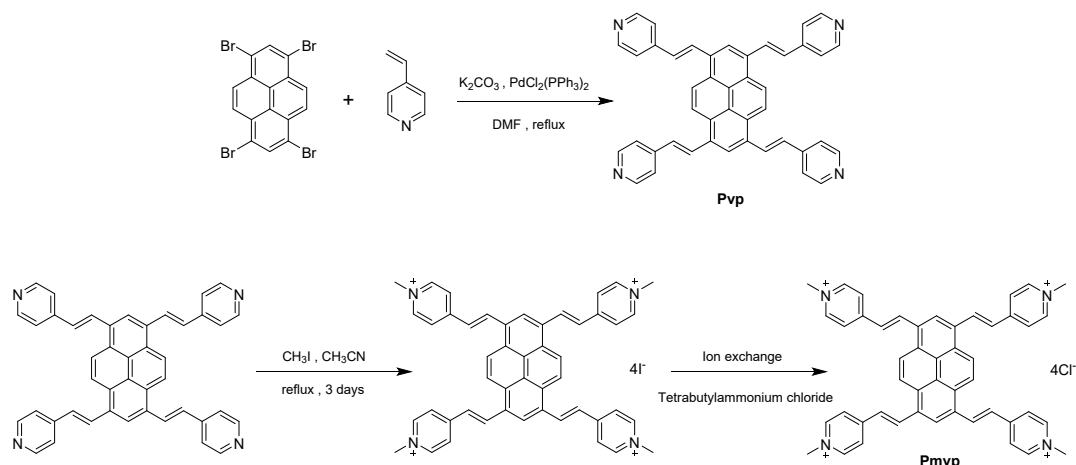

**Scheme. S1** Synthetic route of Pmvp.

**Synthesis of Pmvp:** The synthesis of Pmvp was as shown in Scheme S1. 4-vinyl pyridine (1.06 mL, 10.0 mmol) was added into the solution of 1,3,6,8-tetrabromopyrene (1.04 g, 2.0 mmol) in DMF (60.0 mL), then  $PdCl_2(PPh_3)_2$  (0.14 g, 0.2 mmol) and potassium carbonate (1.66 g, 12.0 mmol) were added. The mixed solution was refluxed for 3 days. Then the reaction solution was cooled down to room temperature and 100 mL water was added. The generated precipitate was collected by filtration and washed with  $H_2O$  to offer the Pvp as a red solid (0.78 g, 63%).

Pvp (0.1 g, 0.163 mmol) was added in 20 mL of  $CH_3CN$ , and  $CH_3I$  (0.71 g, 5.0 mmol) was then added. The mixed solution was refluxed for 3 days. The resulting precipitate was collected by filtration and washed with  $CH_2Cl_2$  several times. The crude product was then dissolved in water and ammonium hexafluorophosphate was added. The resulting precipitate was collected through filtration and dried under a vacuum. After that, the solid was re-dissolved in  $CH_3CN$ , and tetrabutyl ammonium chloride was added. The resulting precipitation was collected through filtration and dried under vacuum to obtain Pmvp as purple black precipitate (0.12 g, 89%).  $^1H$  NMR (400 MHz,  $DMSO-d_6$ )  $\delta$  9.24 - 9.10 (m, 8H), 9.10 - 8.91 (m, 10H), 8.56 (d,  $J = 6.3$  Hz, 8H), 8.02 (d,  $J = 16.0$  Hz, 4H), 4.34 (s, 12H). HRMS (ESI):  $m/z$   $[M-4Cl]^{4+}$  calculated for

C<sub>48</sub>H<sub>42</sub>N<sub>4</sub>: 168.5847; found: 168.5849.

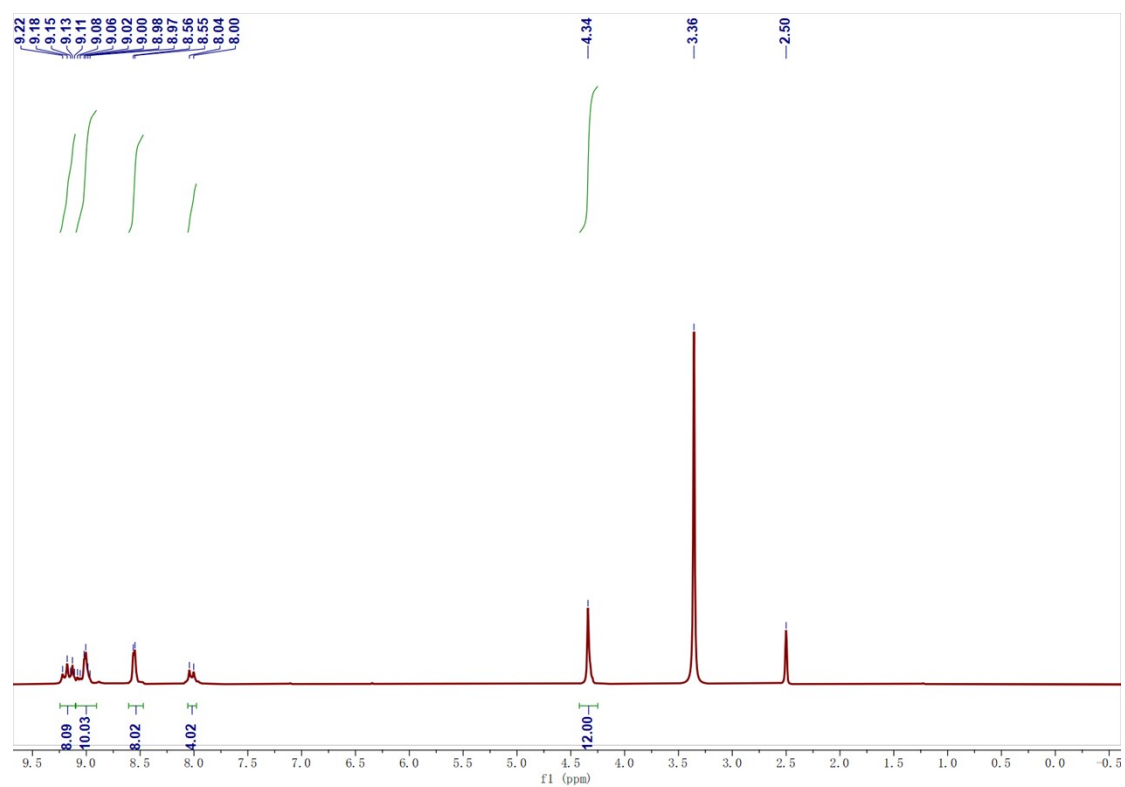

**Fig. S1** <sup>1</sup>H NMR spectrum of compound **Pmvp** in DMSO-*d*<sub>6</sub>.

3#11-12 RT: 0.07-0.07 AV: 2 NL: 1.09E8  
T: FTMS+pESIFullLock.ms[80.0000-1200.0000]

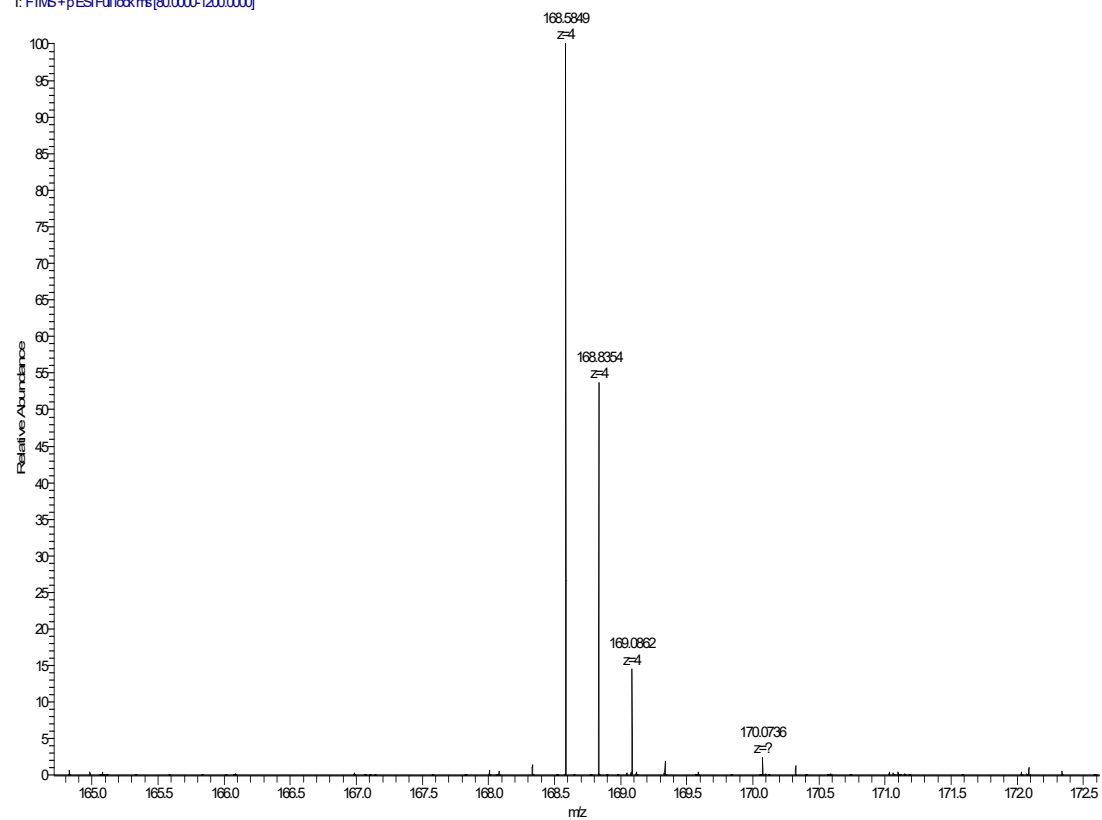

**Fig. S2** HR-ESI-MS spectra of Pmvp.

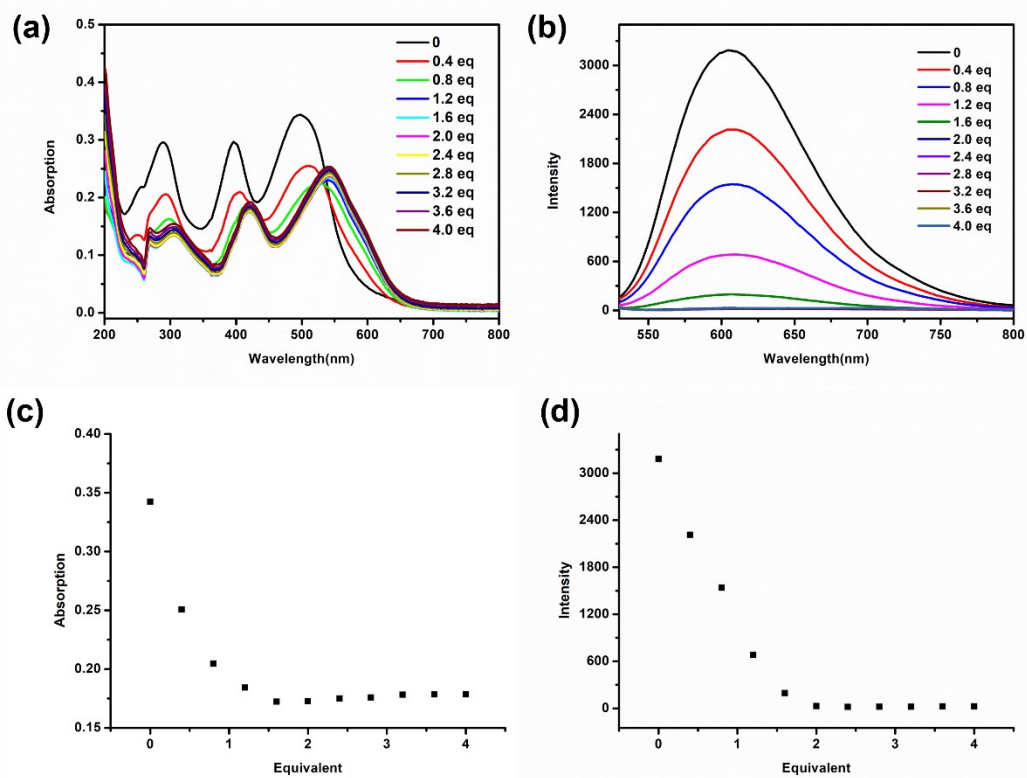

**Fig. S3** (a) UV-vis absorption spectra and (b) fluorescence emission spectra of Pmvp in the presence of an excess CB[8] (1:4); (c) The UV-vis absorption and (d) fluorescence emission curve of Pmvp in the presence of an excess CB[8] (1:4).

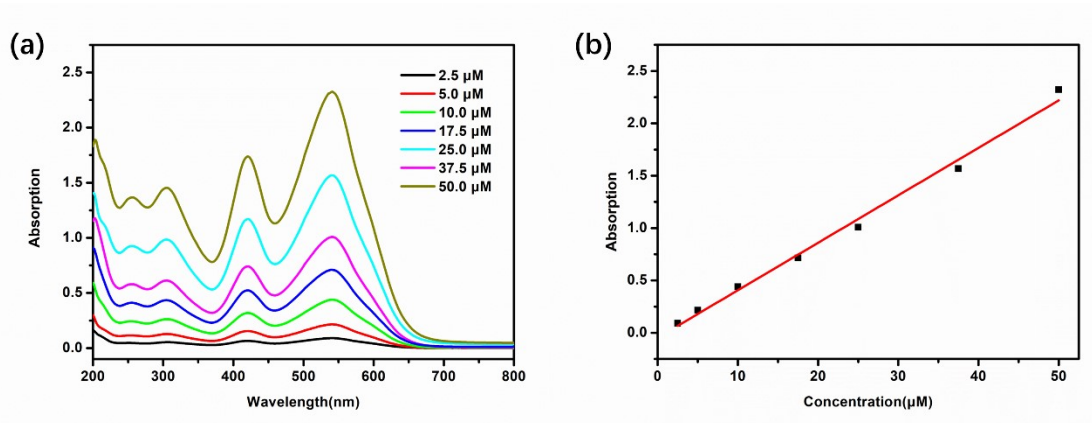

**Fig. S4** (a) UV-vis absorption spectra of SOF at different concentrations; (b) The plot of the absorption of SOF at 540 nm vs [Pmvp].



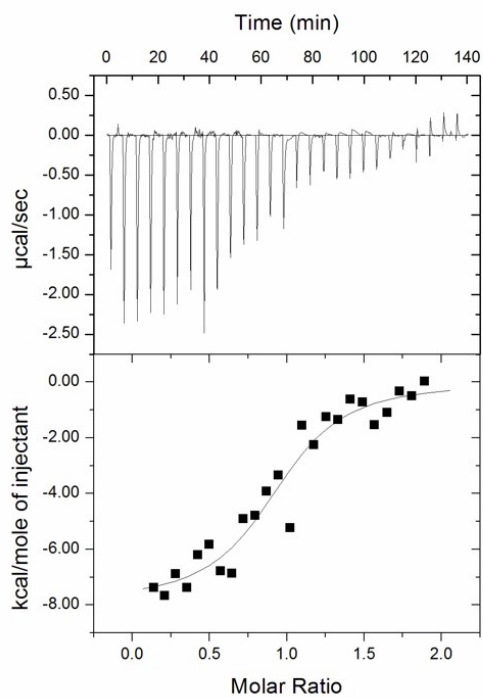

**Fig. S5** ITC data for the titration of CB[8] with Pmvp in water at 298 K.

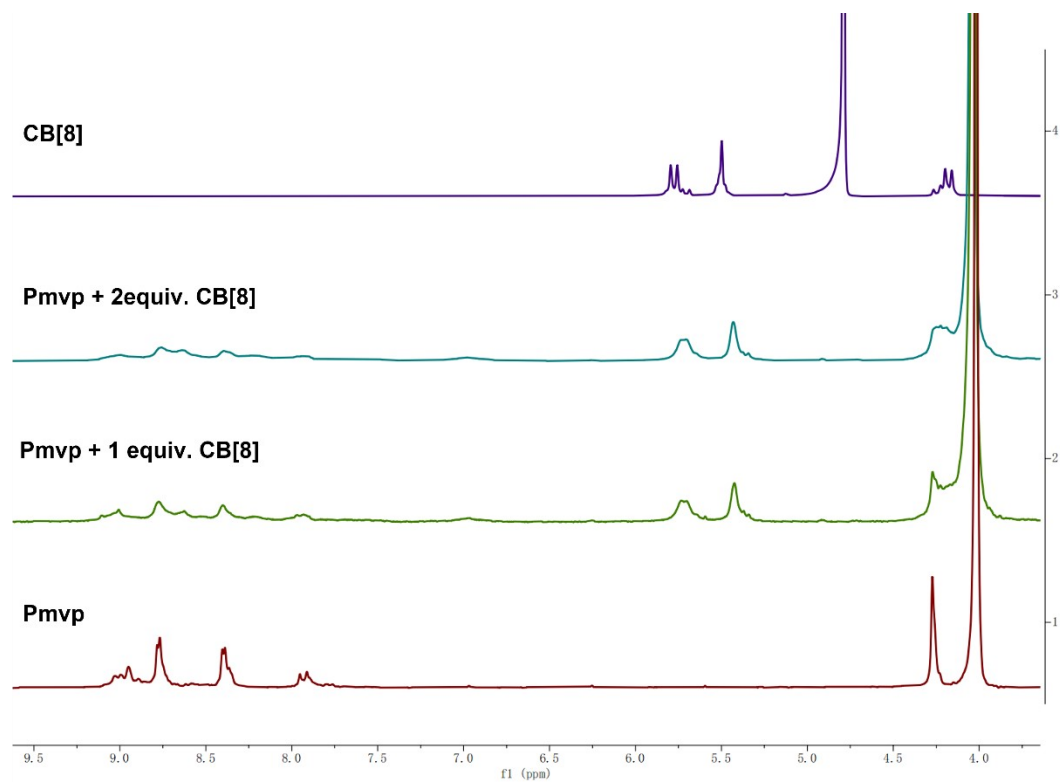

**Fig. S6** <sup>1</sup>H NMR spectra (400 MHz) of Pmvp, Pmvp + 1.0 equiv. CB[8], Pmvp + 2.0 equiv. CB[8] and CB[8].

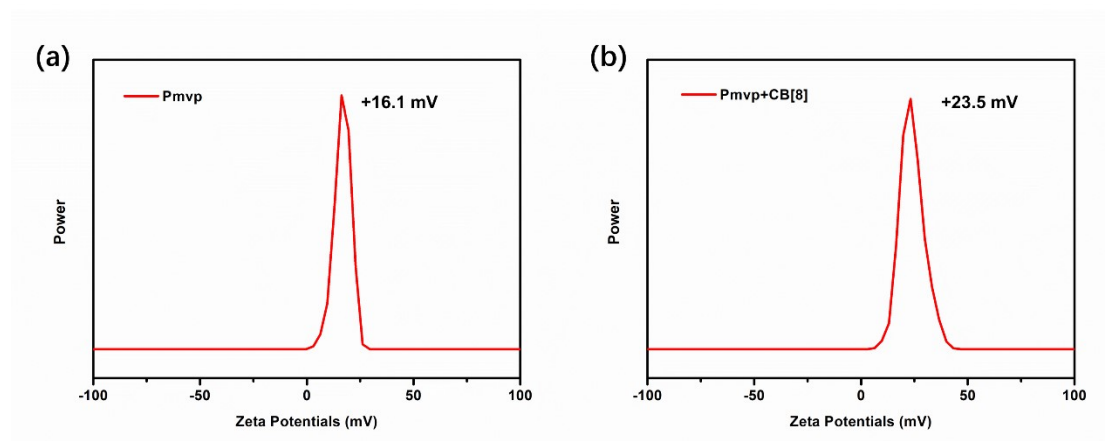

**Fig. S7** Zeta potential of (a) Pmvp and (b) Pmvp + CB[8] (1 : 2).

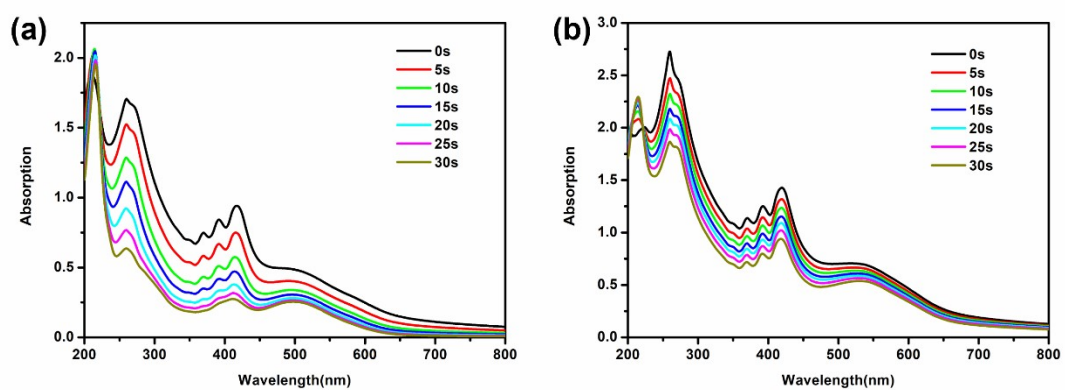

**Fig. S8** (a) UV-vis absorption spectra of ABDA after the addition of Pmvp; (b) UV-vis absorption spectra of ABDA after the addition of SOF.

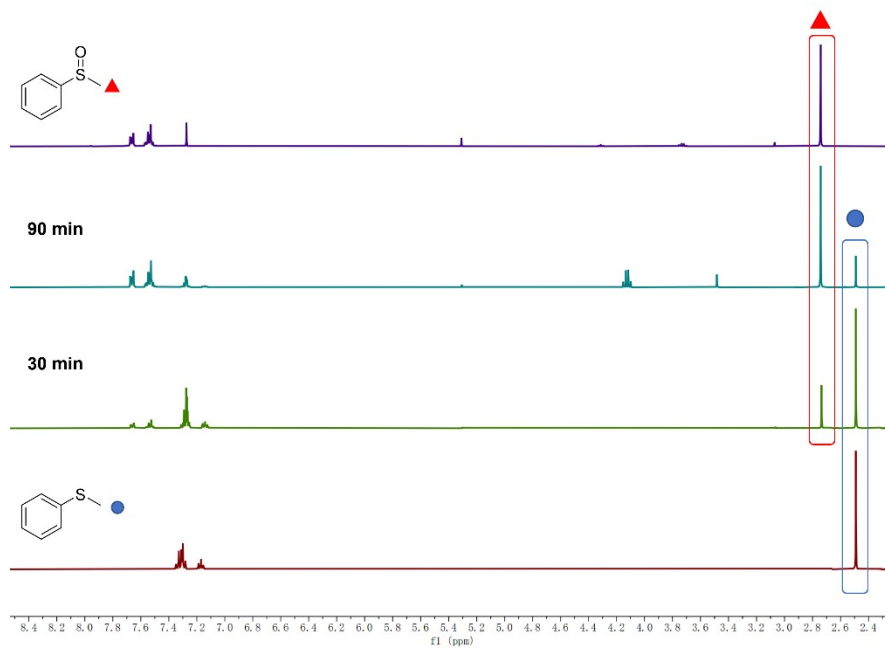

**Fig. S9** Monitoring of photooxidation reaction of thioanisole by  $^1\text{H}$  NMR.

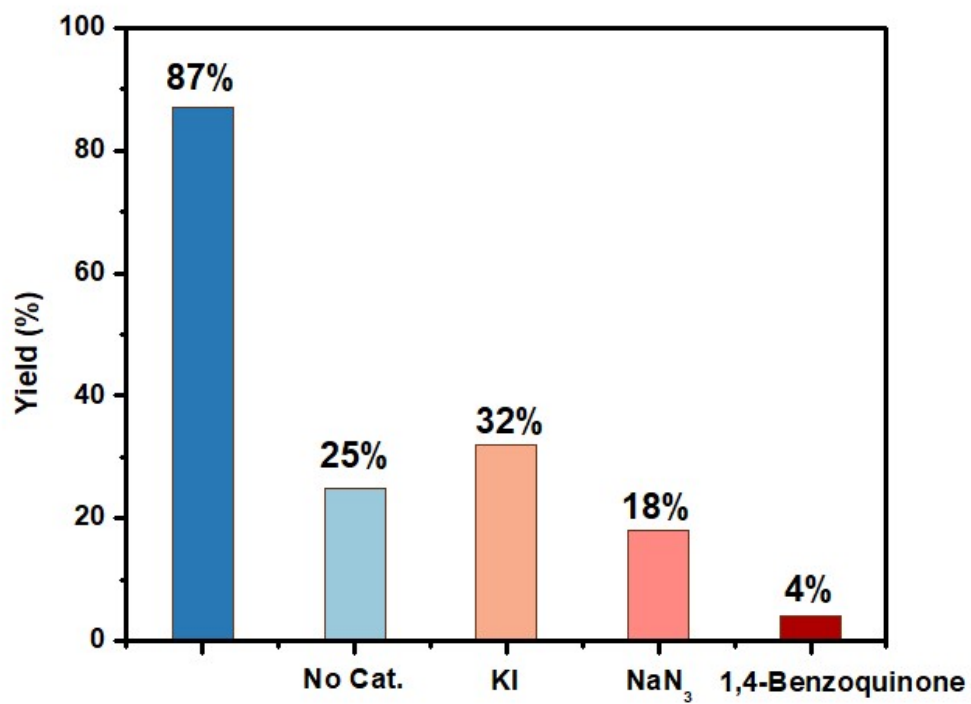

**Fig. S10** Control experiments for photocatalytic aerobic oxidation of thioanisole after the addition of KI, NaN<sub>3</sub> and *p*-benzoquinone.

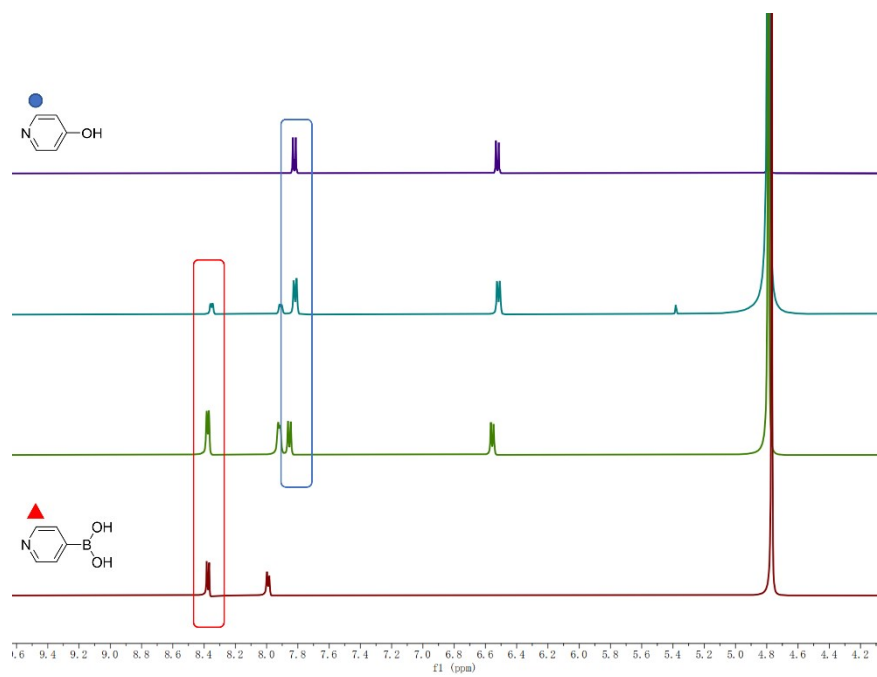

**Fig. S11** Monitoring of photooxidation reaction of 4-pyridylboronic acid by <sup>1</sup>H NMR.

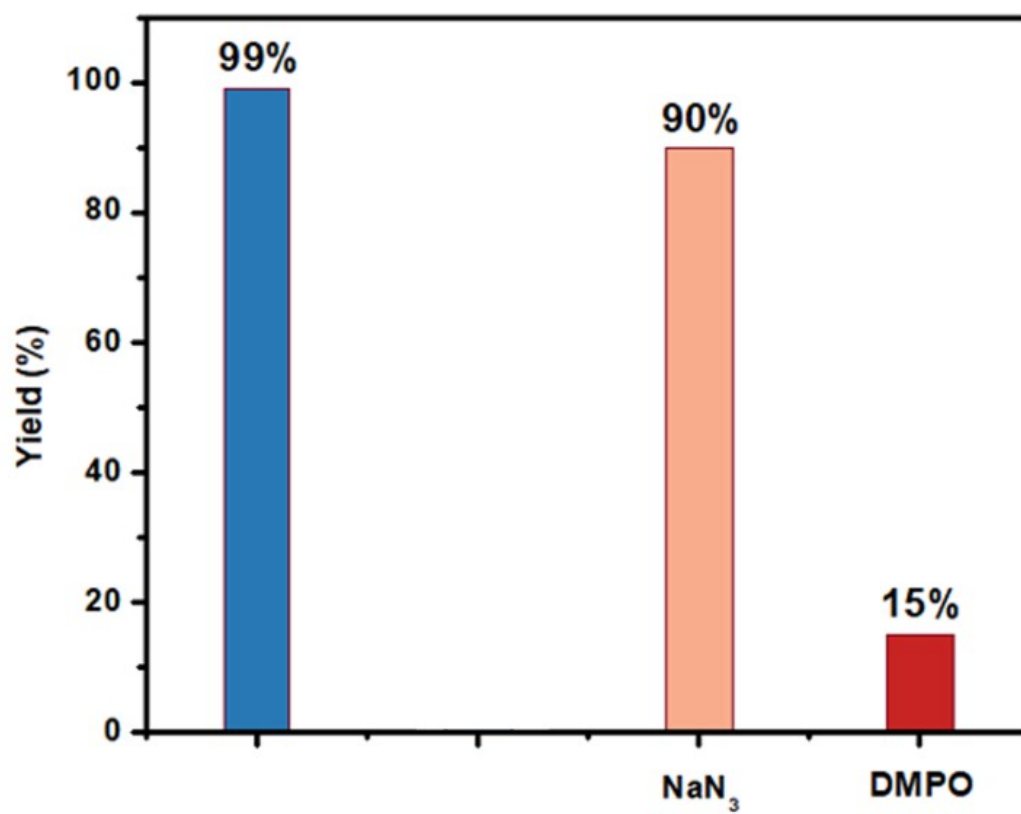

**Fig. S12** Control experiments for the oxidative hydroxylation of arylboronic acid after the addition of NaN<sub>3</sub> and DMPO.



**Table S1.** Control experiments for the photooxidation of thioanisole and 4-pyridylboronic acid promoted by SOF.

| Entry          | Conditions         | Light irradiation | Yield <sup>a</sup> /% |
|----------------|--------------------|-------------------|-----------------------|
| 1 <sup>a</sup> | H <sub>2</sub> O   | Yes               | 87%                   |
| 2 <sup>a</sup> | CH <sub>3</sub> CN | Yes               | 99%                   |
| 3 <sup>b</sup> | H <sub>2</sub> O   | Yes               | 99%                   |
| 4 <sup>b</sup> | CH <sub>3</sub> CN | Yes               | 99%                   |

<sup>a</sup>) photooxidation of thioanisole. <sup>b</sup>) photooxidation of 4-pyridylboronic.

## **<sup>1</sup>H NMR data of 2a-2n**

### **2a. Phenyl methyl sulfoxide**

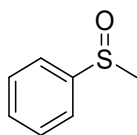

<sup>1</sup>H NMR (400 MHz, CDCl<sub>3</sub>) δ 7.68 - 7.61 (m, 2H), 7.58 - 7.46 (m, 3H), 2.73 (s, 3H).

<sup>13</sup>C NMR (101 MHz, CDCl<sub>3</sub>) δ 145.64, 129.34, 123.47, 43.95.

The spectral data obtained were identical with those reported in literature.<sup>[1]</sup>

### **2b. 4-Me-Phenyl methyl sulfoxide**

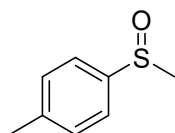

<sup>1</sup>H NMR (400 MHz, CDCl<sub>3</sub>) δ 7.52 (d, *J* = 8.2 Hz, 2H), 7.34 - 7.29 (m, 2H), 2.69 (s, 3H), 2.40 (s, 3H). <sup>13</sup>C NMR (101 MHz, CDCl<sub>3</sub>) δ 142.27, 141.48, 129.97, 43.88, 21.34.

The spectral data obtained were identical with those reported in literature.<sup>[1]</sup>

### **2c. 4-OMe-Phenyl methyl sulfoxide**

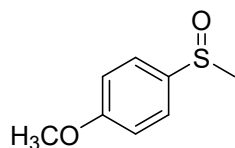

<sup>1</sup>H NMR (400 MHz, CDCl<sub>3</sub>) δ 7.58 (d, *J* = 8.8 Hz, 2H), 7.02 (d, *J* = 8.8 Hz, 2H), 3.84 (s, 3H), 2.69 (s, 3H). <sup>13</sup>C NMR (101 MHz, CDCl<sub>3</sub>) δ 162.06, 136.55, 125.58, 125.49, 114.95, 114.86, 55.64, 55.56, 44.06.

The spectral data obtained were identical with those reported in literature.<sup>[1]</sup>

### **2d. 4-F-Phenyl methyl sulfoxide**

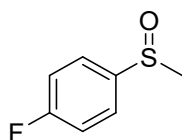

$^1\text{H}$  NMR (400 MHz,  $\text{CDCl}_3$ )  $\delta$  7.68 - 7.56 (m, 2H), 7.23 - 7.14 (m, 2H), 2.68 (s, 3H).  
 $^{13}\text{C}$  NMR (101 MHz,  $\text{CDCl}_3$ )  $\delta$  165.42, 162.92, 140.98, 140.95, 125.77, 116.68, 116.46, 44.03, 44.01.

The spectral data obtained were identical with those reported in literature.<sup>[1]</sup>

### 2e. 4-Cl-Phenyl methyl sulfoxide

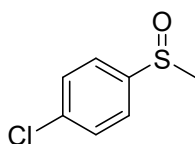

$^1\text{H}$  NMR (400 MHz,  $\text{CDCl}_3$ )  $\delta$  7.55 - 7.49 (m, 2H), 7.46 - 7.40 (m, 2H), 2.65 (s, 3H).  
 $^{13}\text{C}$  NMR (101 MHz,  $\text{CDCl}_3$ )  $\delta$  143.88, 136.95, 129.40, 124.76, 43.74.

The spectral data obtained were identical with those reported in literature.<sup>[1]</sup>

### 2f. 4-Br-Phenyl methyl sulfoxide

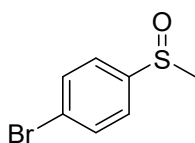

$^1\text{H}$  NMR (400 MHz,  $\text{CDCl}_3$ )  $\delta$  7.61 - 7.54 (m, 2H), 7.48 - 7.40 (m, 2H), 2.63 (s, 3H).  
 $^{13}\text{C}$  NMR (101 MHz,  $\text{CDCl}_3$ )  $\delta$  144.58, 132.25, 125.12, 124.88, 43.70.

The spectral data obtained were identical with those reported in literature.<sup>[1]</sup>

### 2g. 4-CHO-Phenyl methyl sulfoxide

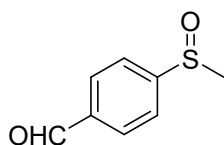

$^1\text{H}$  NMR (400 MHz,  $\text{CDCl}_3$ )  $\delta$  10.04 (s, 1H), 8.00 (d,  $J = 8.4$  Hz, 2H), 7.78 (d,  $J = 8.3$  Hz, 2H), 2.75 (s, 3H).  $^{13}\text{C}$  NMR (101 MHz,  $\text{CDCl}_3$ )  $\delta$  191.08, 152.22, 137.97, 130.29,

124.05, 43.61.

The spectral data obtained were identical with those reported in literature.<sup>[2]</sup>

### 2h. 4-CN-Phenyl methyl sulfoxide

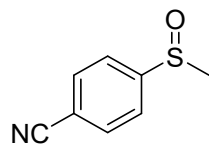

<sup>1</sup>H NMR (400 MHz, CDCl<sub>3</sub>) δ 7.83 - 7.76 (m, 2H), 7.75 - 7.69 (m, 2H), 2.72 (s, 3H).

<sup>13</sup>C NMR (101 MHz, CDCl<sub>3</sub>) δ 151.16, 132.76, 124.09, 117.53, 114.41, 43.51.

The spectral data obtained were identical with those reported in literature.<sup>[3]</sup>

### 2i. 4-NO<sub>2</sub>-Phenyl methyl sulfoxide

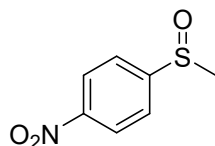

<sup>1</sup>H NMR (400 MHz, CDCl<sub>3</sub>) δ 8.37 (d, *J* = 8.8 Hz, 2H), 7.82 (d, *J* = 8.8 Hz, 2H), 2.78 (s, 3H). <sup>13</sup>C NMR (101 MHz, CDCl<sub>3</sub>) δ 153.13, 149.37, 124.59, 124.40, 43.77.

The spectral data obtained were identical with those reported in literature.<sup>[3]</sup>

### 2j. 4-NH<sub>2</sub>-Phenyl methyl sulfoxide

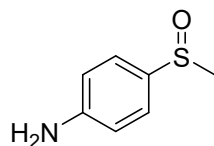

<sup>1</sup>H NMR (400 MHz, CDCl<sub>3</sub>) δ 7.44 (d, *J* = 8.6 Hz, 2H), 6.75 (d, *J* = 8.6 Hz, 2H), 2.68 (s, 3H). <sup>13</sup>C NMR (101 MHz, CDCl<sub>3</sub>) δ 149.48, 133.19, 125.66, 115.03, 43.73.

The spectral data obtained were identical with those reported in literature.<sup>[4]</sup>

### 2k. Phenyl ethyl sulfoxide

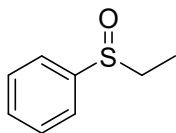

$^1\text{H}$  NMR (400 MHz,  $\text{CDCl}_3$ )  $\delta$  7.63 - 7.56 (m, 2H), 7.54 - 7.44 (m, 3H), 2.82 (ddq,  $J = 54.0, 13.3, 7.4$  Hz, 2H), 1.18 (t,  $J = 7.4$  Hz, 3H).  $^{13}\text{C}$  NMR (101 MHz,  $\text{CDCl}_3$ )  $\delta$  143.11, 130.89, 129.09, 124.11, 50.22, 5.93.

The spectral data obtained were identical with those reported in literature.<sup>[5]</sup>

## 2l. 2-OMe-Phenyl methyl sulfoxide

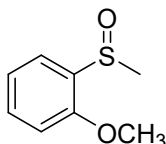

$^1\text{H}$  NMR (400 MHz,  $\text{CDCl}_3$ )  $\delta$  7.79 (dd,  $J = 7.7, 1.7$  Hz, 1H), 7.43 (ddd,  $J = 8.2, 7.4, 1.7$  Hz, 1H), 7.17 (td,  $J = 7.6, 1.0$  Hz, 1H), 6.90 (dd,  $J = 8.2, 0.9$  Hz, 1H), 3.87 (s, 3H), 2.75 (s, 3H).  $^{13}\text{C}$  NMR (101 MHz,  $\text{CDCl}_3$ )  $\delta$  154.68, 132.82, 131.89, 124.49, 121.59, 110.48, 55.62, 41.07.

The spectral data obtained were identical with those reported in literature.<sup>[6]</sup>

## 2m. 2-Cl-Phenyl methyl sulfoxide

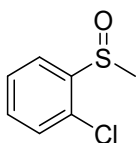

$^1\text{H}$  NMR (400 MHz,  $\text{CDCl}_3$ )  $\delta$  7.87 (dd,  $J = 7.8, 1.7$  Hz, 1H), 7.46 (td,  $J = 7.5, 1.3$  Hz, 1H), 7.41 - 7.28 (m, 2H), 2.75 (s, 3H).  $^{13}\text{C}$  NMR (101 MHz,  $\text{CDCl}_3$ )  $\delta$  143.22, 131.80, 129.55, 127.94, 125.02, 41.38.

The spectral data obtained were identical with those reported in literature.<sup>[4]</sup>

## 2n. 2-Br-Phenyl methyl sulfoxide

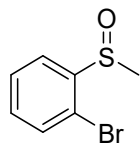

$^1\text{H}$  NMR (400 MHz,  $\text{CDCl}_3$ )  $\delta$  7.90 (dd,  $J = 7.8, 1.6$  Hz, 1H), 7.57 - 7.50 (m, 2H), 7.34 (ddd,  $J = 8.0, 7.3, 1.7$  Hz, 1H), 2.78 (s, 3H).  $^{13}\text{C}$  NMR (101 MHz,  $\text{CDCl}_3$ )  $\delta$  145.11, 132.77, 132.15, 128.59, 125.50, 118.25, 41.72.

The spectral data obtained were identical with those reported in literature.<sup>[4]</sup>

## **<sup>1</sup>H NMR data of 4a-4k**

### **4a. 4-hydroxypyridine**

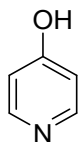

<sup>1</sup>H NMR (400 MHz, DMSO-*d*<sub>6</sub>) δ 7.75 - 7.69 (m, 2H), 6.24 - 6.15 (m, 2H). <sup>13</sup>C NMR (101 MHz, DMSO-*d*<sub>6</sub>) δ 176.19, 139.72, 116.25.

The spectral data obtained were identical with those reported in literature.<sup>[7]</sup>

### **4b. Phenol**

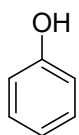

<sup>1</sup>H NMR (400 MHz, CDCl<sub>3</sub>) δ 7.27 - 7.21 (m, 2H), 6.93 (tt, *J* = 7.4, 1.1 Hz, 1H), 6.89 - 6.77 (m, 2H), 5.23 (s, 1H). <sup>13</sup>C NMR (101 MHz, CDCl<sub>3</sub>) δ 155.30, 129.67, 120.81, 115.27.

The spectral data obtained were identical with those reported in literature.<sup>[8]</sup>

### **4c. 4-methylphenol**

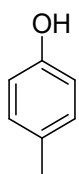

<sup>1</sup>H NMR (400 MHz, DMSO-*d*<sub>6</sub>) δ 9.12 (s, 1H), 6.99 - 6.90 (m, 2H), 6.64 (d, *J* = 8.4 Hz, 2H), 2.17 (s, 3H). <sup>13</sup>C NMR (101 MHz, DMSO-*d*<sub>6</sub>) δ 155.45, 130.17, 127.59, 115.46, 20.55.

The spectral data obtained were identical with those reported in literature.<sup>[7]</sup>

### **4d. 4-Fluorophenol**

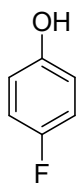

$^1\text{H}$  NMR (400 MHz,  $\text{CDCl}_3$ )  $\delta$  6.98 - 6.88 (m, 2H), 6.82 - 6.73 (m, 2H), 5.28 (s, 1H).  
 $^{13}\text{C}$  NMR (101 MHz,  $\text{CDCl}_3$ )  $\delta$  158.49, 156.12, 151.41, 151.39, 116.33, 116.25, 116.16, 115.93.

The spectral data obtained were identical with those reported in literature.<sup>[8]</sup>

#### 4e. 4-chlorophenol

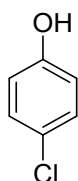

$^1\text{H}$  NMR (400 MHz,  $\text{CDCl}_3$ )  $\delta$  7.23 - 7.16 (m, 1H), 6.80 - 6.74 (m, 1H), 5.39 - 5.33 (m, 1H).  $^{13}\text{C}$  NMR (101 MHz,  $\text{CDCl}_3$ )  $\delta$  153.89, 129.51, 125.65, 116.63.

The spectral data obtained were identical with those reported in literature.<sup>[8]</sup>

#### 4f. 4-bromophenol

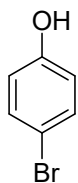

$^1\text{H}$  NMR (400 MHz,  $\text{CDCl}_3$ )  $\delta$  7.37 - 7.28 (m, 2H), 6.76 - 6.66 (m, 2H), 5.25 (s, 1H).  
 $^{13}\text{C}$  NMR (101 MHz,  $\text{CDCl}_3$ )  $\delta$  154.55, 132.43, 117.17, 112.81.

The spectral data obtained were identical with those reported in literature.<sup>[8]</sup>

#### 4g. 3-hydroxybenzaldehyde

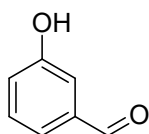



$^1\text{H}$  NMR (400 MHz,  $\text{CDCl}_3$ )  $\delta$  9.95 (s, 1H), 7.47 - 7.38 (m, 3H), 7.16 (ddd,  $J = 7.1$ , 2.6, 1.9 Hz, 1H).  $^{13}\text{C}$  NMR (101 MHz,  $\text{CDCl}_3$ )  $\delta$  192.72, 156.52, 137.70, 130.39, 123.53, 122.21, 114.69.

The spectral data obtained were identical with those reported in literature.<sup>[9]</sup>

#### 4h. 2-hydroxybenzonitrile

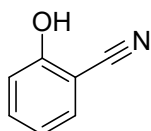

$^1\text{H}$  NMR (400 MHz,  $\text{DMSO}-d_6$ )  $\delta$  11.08 (s, 1H), 7.58 (dd,  $J = 7.8$ , 1.7 Hz, 1H), 7.48 (ddd,  $J = 8.9$ , 7.4, 1.7 Hz, 1H), 7.00 (dd,  $J = 8.5$ , 1.0 Hz, 1H), 6.91 (td,  $J = 7.5$ , 1.0 Hz, 1H).  $^{13}\text{C}$  NMR (101 MHz,  $\text{DMSO}-d_6$ )  $\delta$  160.17, 134.76, 133.28, 119.60, 117.07, 116.18, 98.86.

The spectral data obtained were identical with those reported in literature.<sup>[10]</sup>

#### 4i. 3-hydroxybenzonitrile

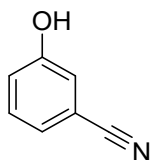

$^1\text{H}$  NMR (400 MHz,  $\text{CDCl}_3$ )  $\delta$  7.35 (t,  $J = 7.9$  Hz, 1H), 7.23 (dt,  $J = 7.7$ , 1.3 Hz, 1H), 7.19 - 7.12 (m, 2H).  $^{13}\text{C}$  NMR (101 MHz,  $\text{CDCl}_3$ )  $\delta$  156.43, 130.55, 124.24, 120.96, 118.71, 112.20.

The spectral data obtained were identical with those reported in literature.<sup>[11]</sup>

#### 4j. 4-nitrophenol

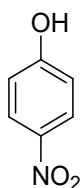

$^1\text{H}$  NMR (400 MHz,  $\text{DMSO}-d_6$ )  $\delta$  11.08 (s, 1H), 8.09 (d,  $J = 9.2$  Hz, 2H), 6.91 (d,  $J =$

9.2 Hz, 2H).  $^{13}\text{C}$  NMR (101 MHz,  $\text{DMSO-}d_6$ )  $\delta$  164.51, 140.15, 126.74, 116.34.

The spectral data obtained were identical with those reported in literature.<sup>[8]</sup>

#### 4k. 5-pyrimidinol

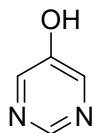

$^1\text{H}$  NMR (400 MHz,  $\text{DMSO-}d_6$ )  $\delta$  10.52 (s, 1H), 8.66 (s, 1H), 8.33 (s, 2H).  $^{13}\text{C}$  NMR (101 MHz,  $\text{DMSO-}d_6$ )  $\delta$  152.47, 150.31, 144.65.

The spectral data obtained were identical with those reported in literature.<sup>[12]</sup>

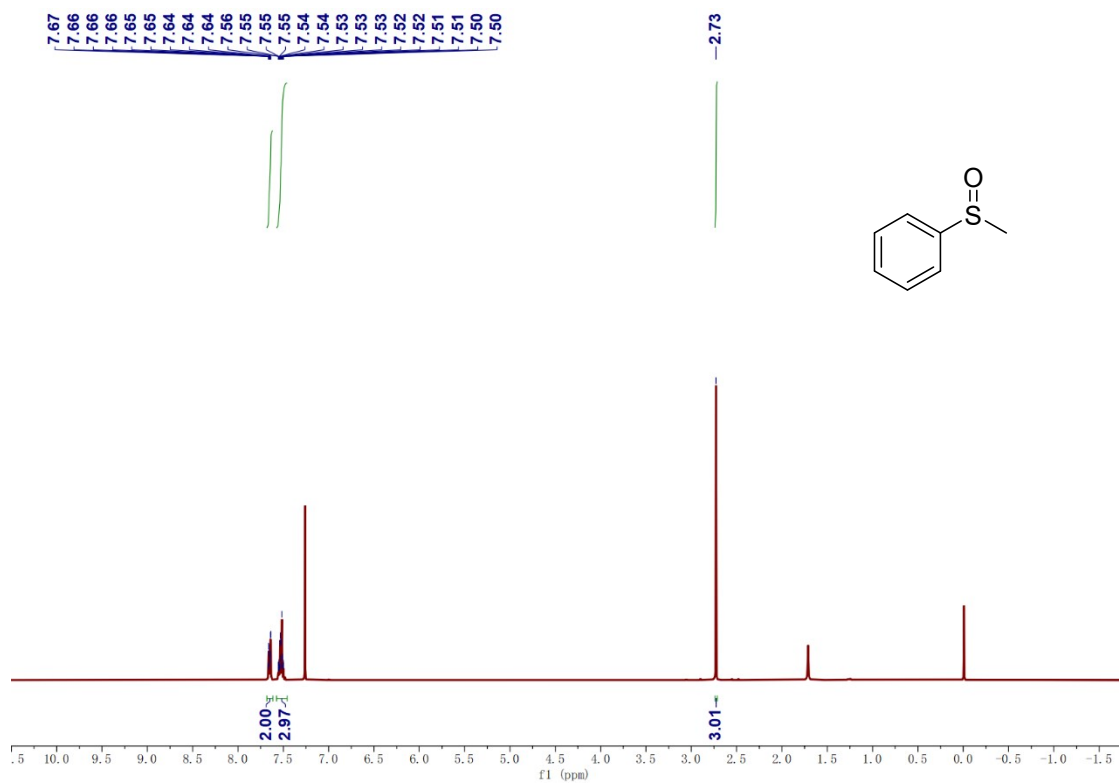

Fig. S13  $^1\text{H}$  NMR spectrum of **2a** in  $\text{CDCl}_3$ .

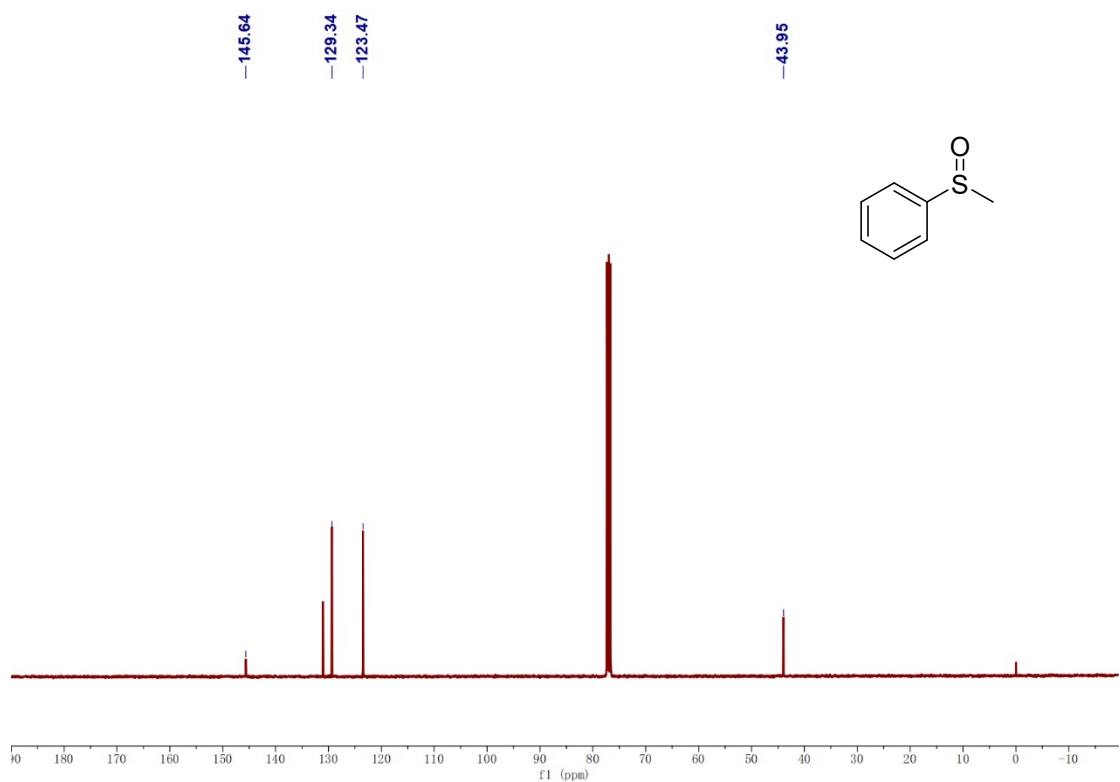

Fig. S14  $^{13}\text{C}$  NMR spectrum of **2a** in  $\text{CDCl}_3$ .

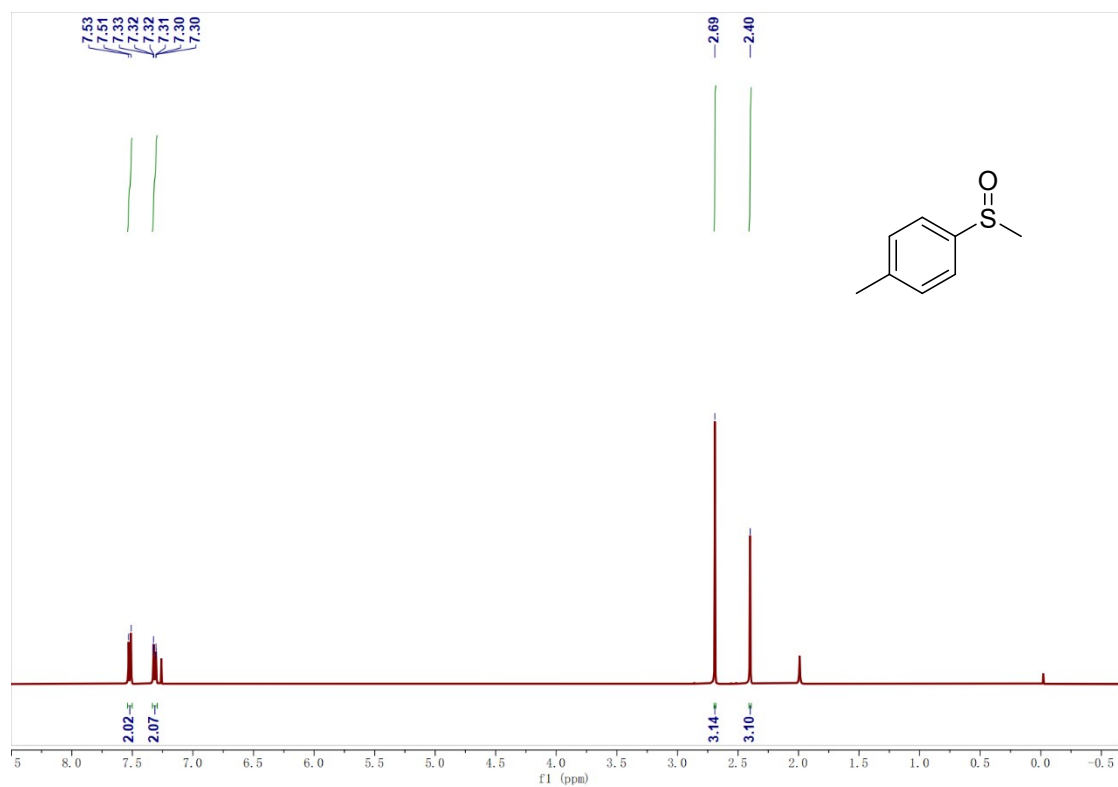

**Fig. S15** <sup>1</sup>H NMR spectrum of **2b** in CDCl<sub>3</sub>.

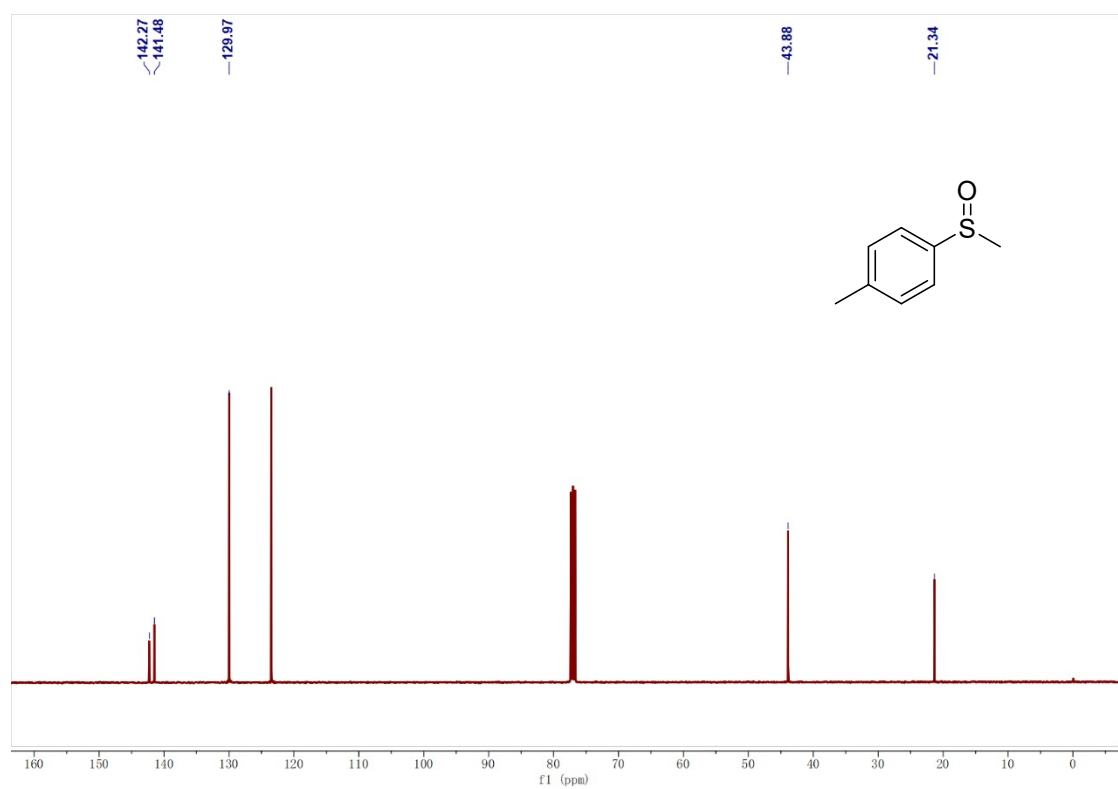

**Fig. S16** <sup>13</sup>C NMR spectrum of **2b** in CDCl<sub>3</sub>.

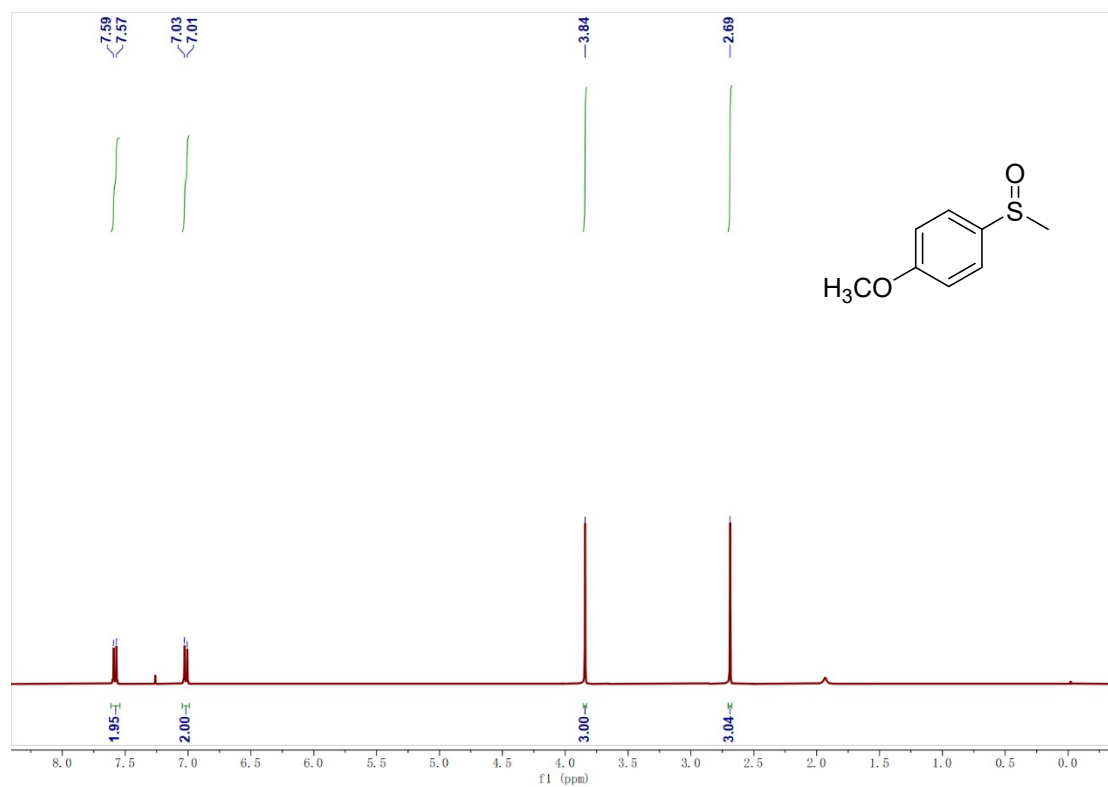

Fig. S17  $^1\text{H}$  NMR spectrum of **2c** in  $\text{CDCl}_3$ .

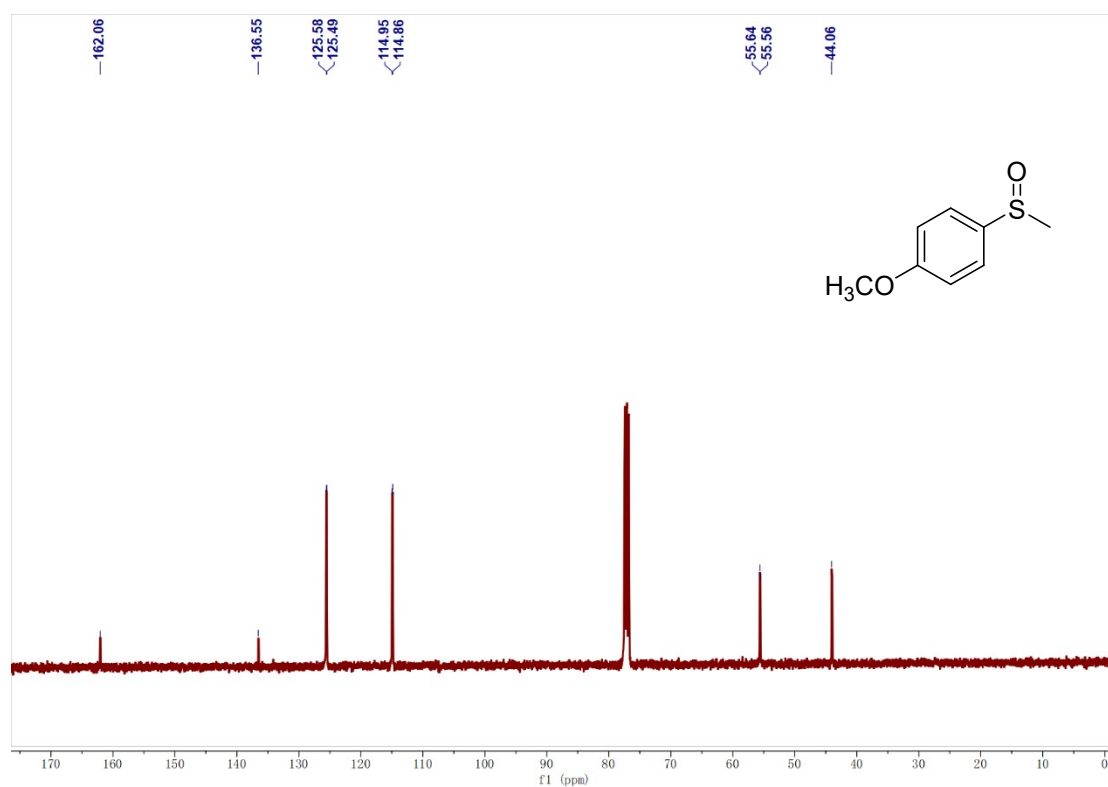

Fig. S18  $^{13}\text{C}$  NMR spectrum of **2c** in  $\text{CDCl}_3$ .

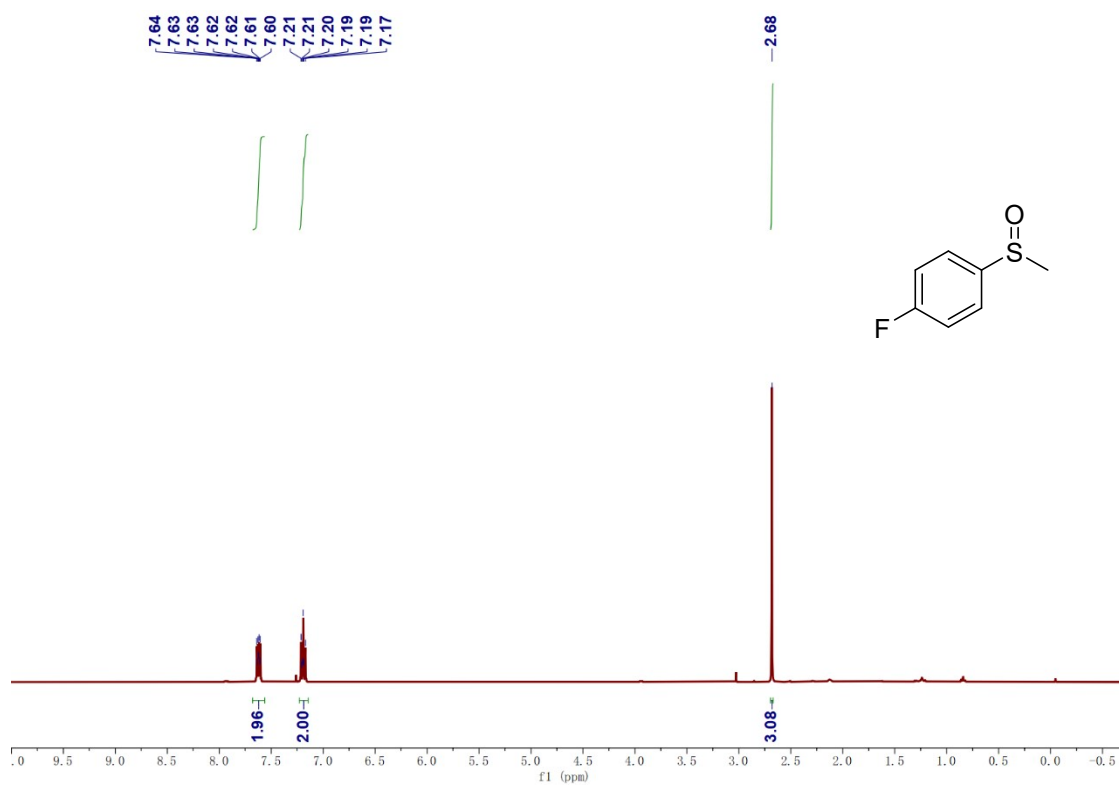

Fig. S19  $^1\text{H}$  NMR spectrum of **2d** in  $\text{CDCl}_3$ .

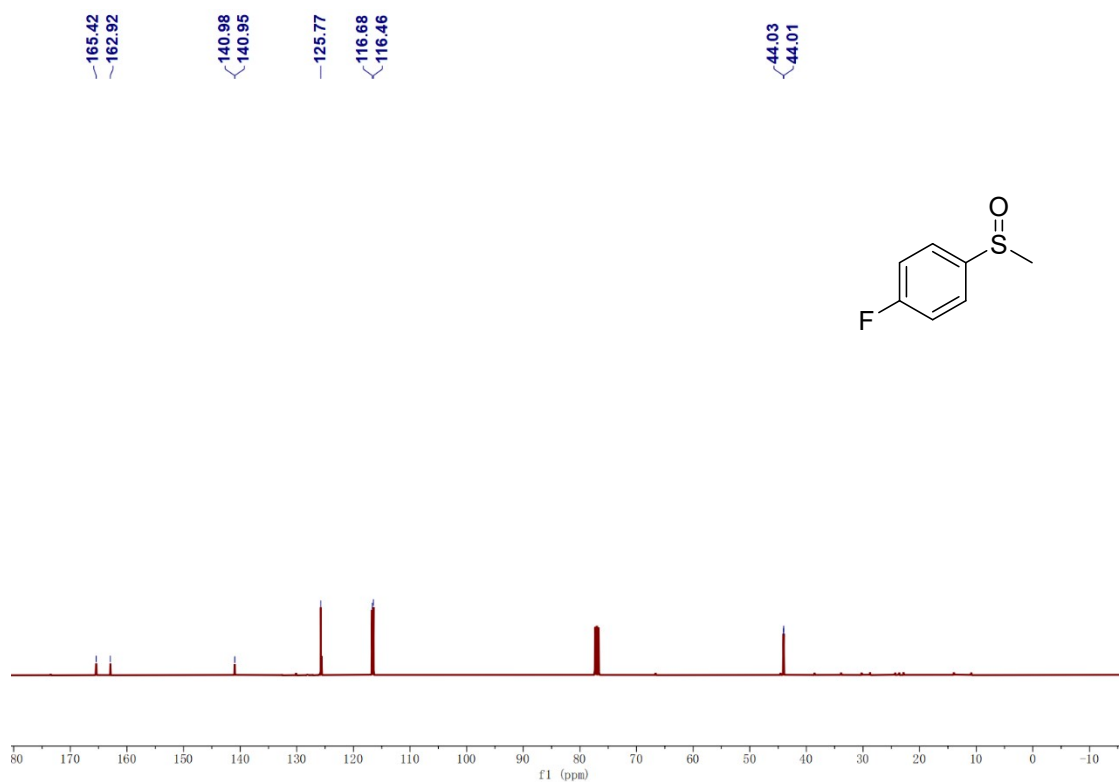

Fig. S20  $^{13}\text{C}$  NMR spectrum of **2d** in  $\text{CDCl}_3$ .

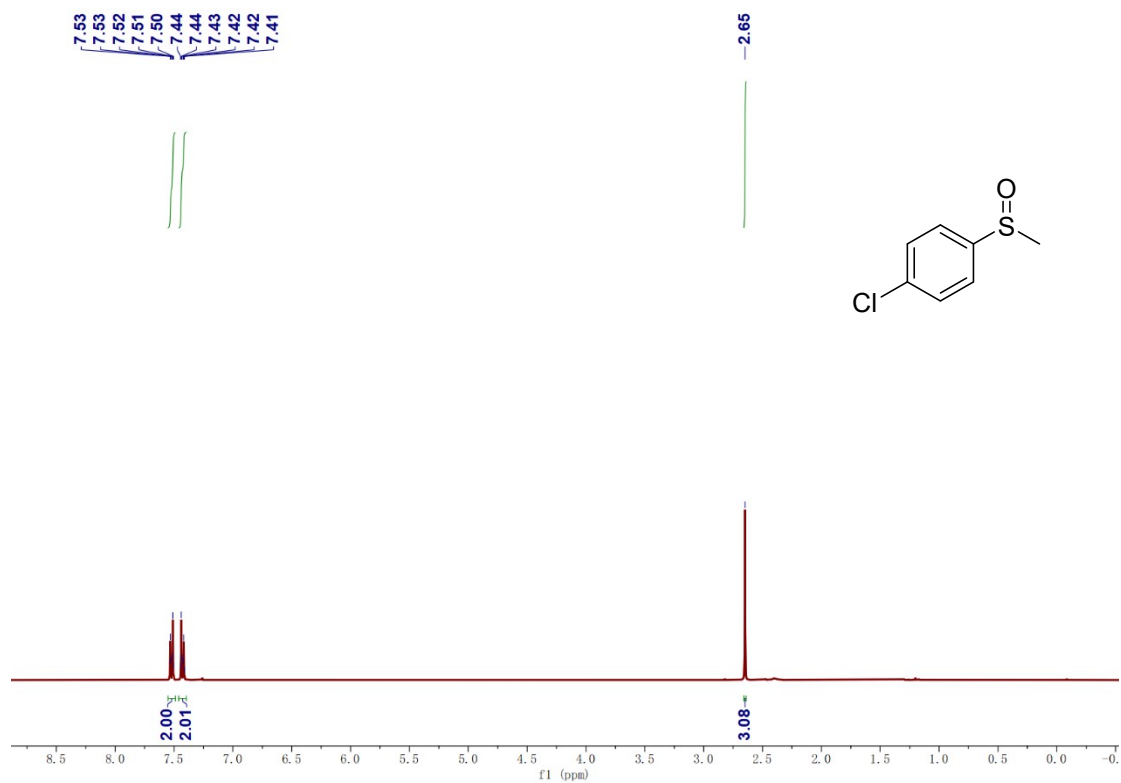

Fig. S21  $^1\text{H}$  NMR spectrum of **2e** in  $\text{CDCl}_3$ .

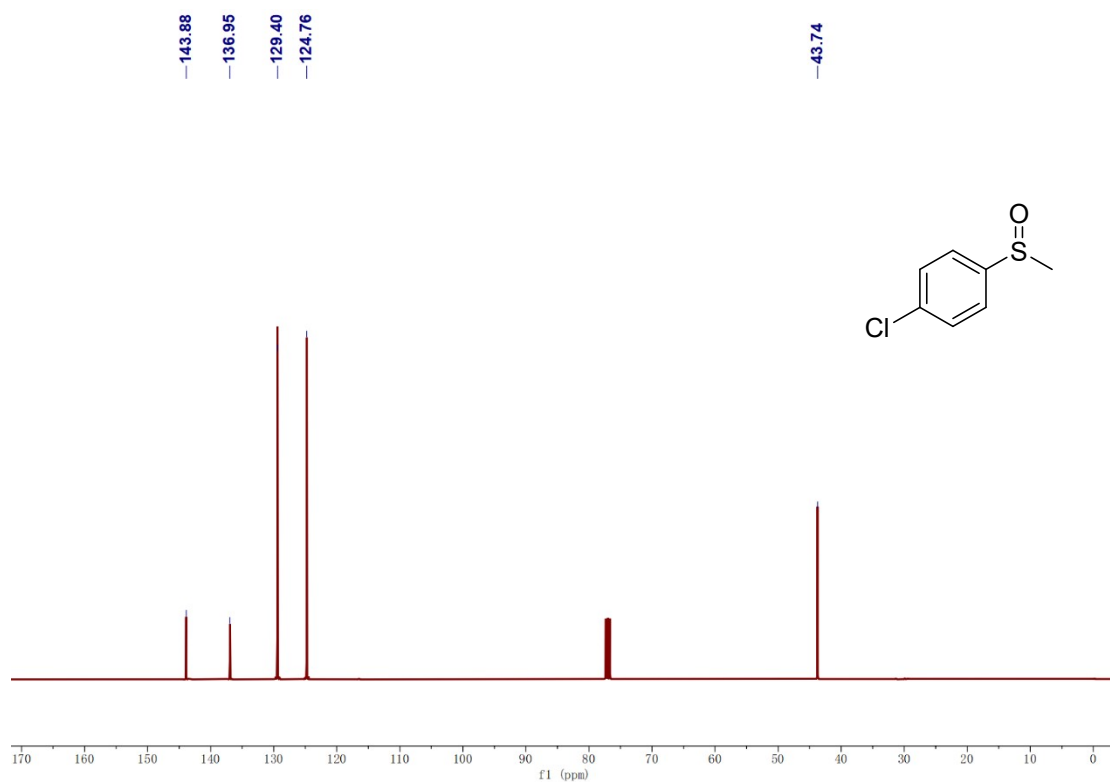

Fig. S22  $^{13}\text{C}$  NMR spectrum of **2e** in  $\text{CDCl}_3$ .

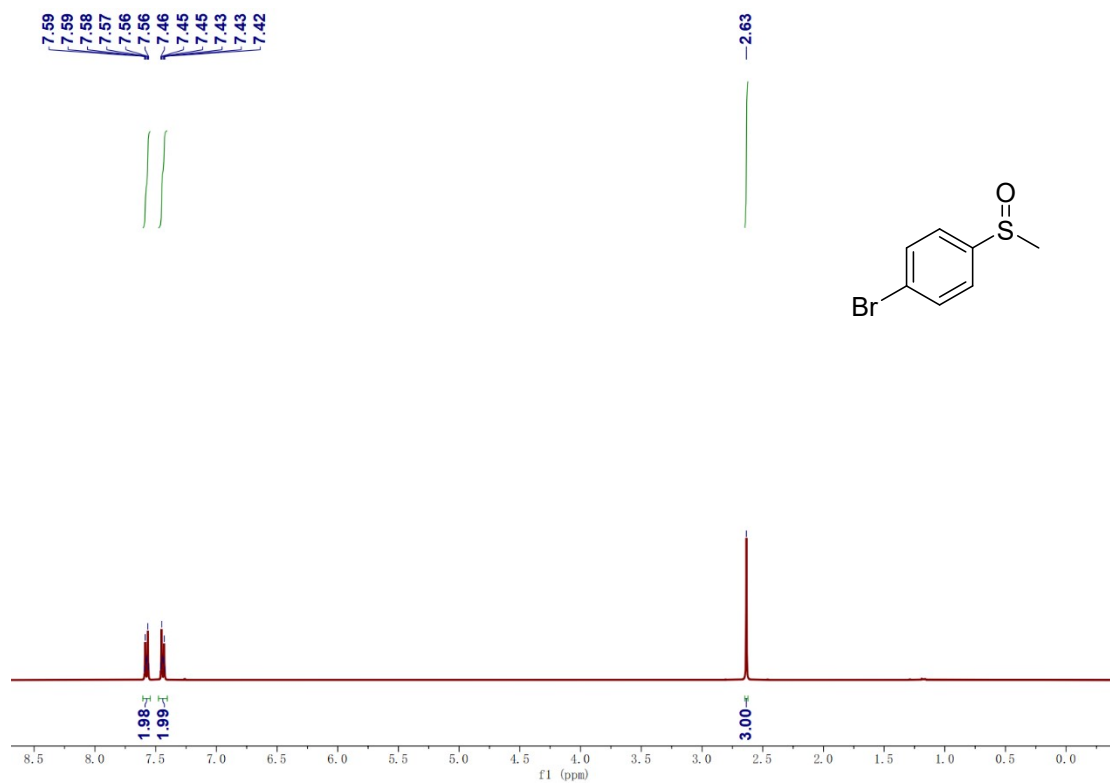

**Fig. S23**  $^1\text{H}$  NMR spectrum of **2f** in  $\text{CDCl}_3$ .

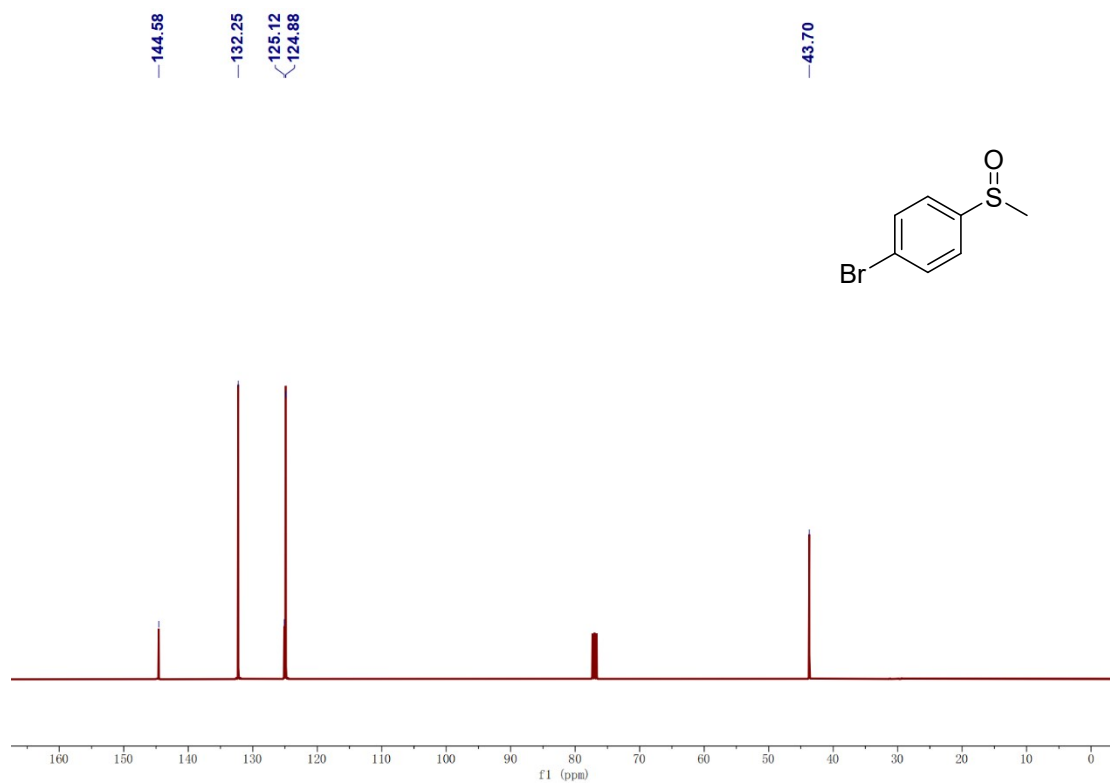

**Fig. S24**  $^{13}\text{C}$  NMR spectrum of **2f** in  $\text{CDCl}_3$ .



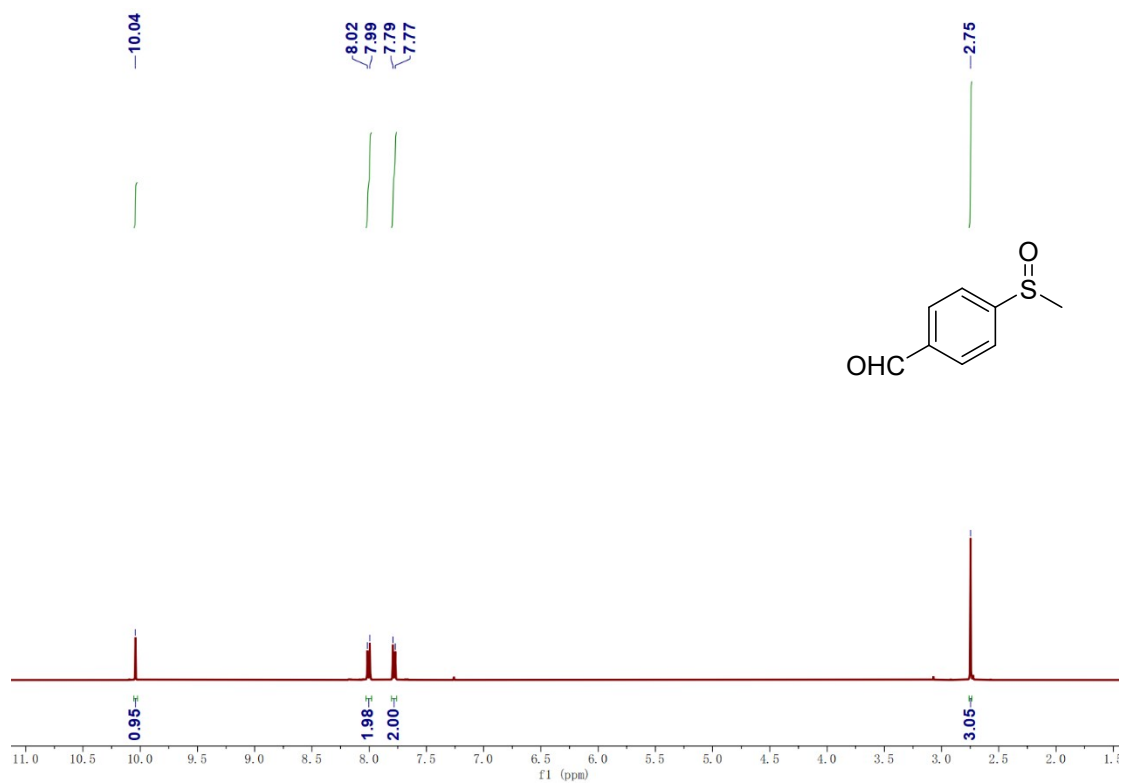

Fig. S25  $^1\text{H}$  NMR spectrum of **2g** in  $\text{CDCl}_3$ .

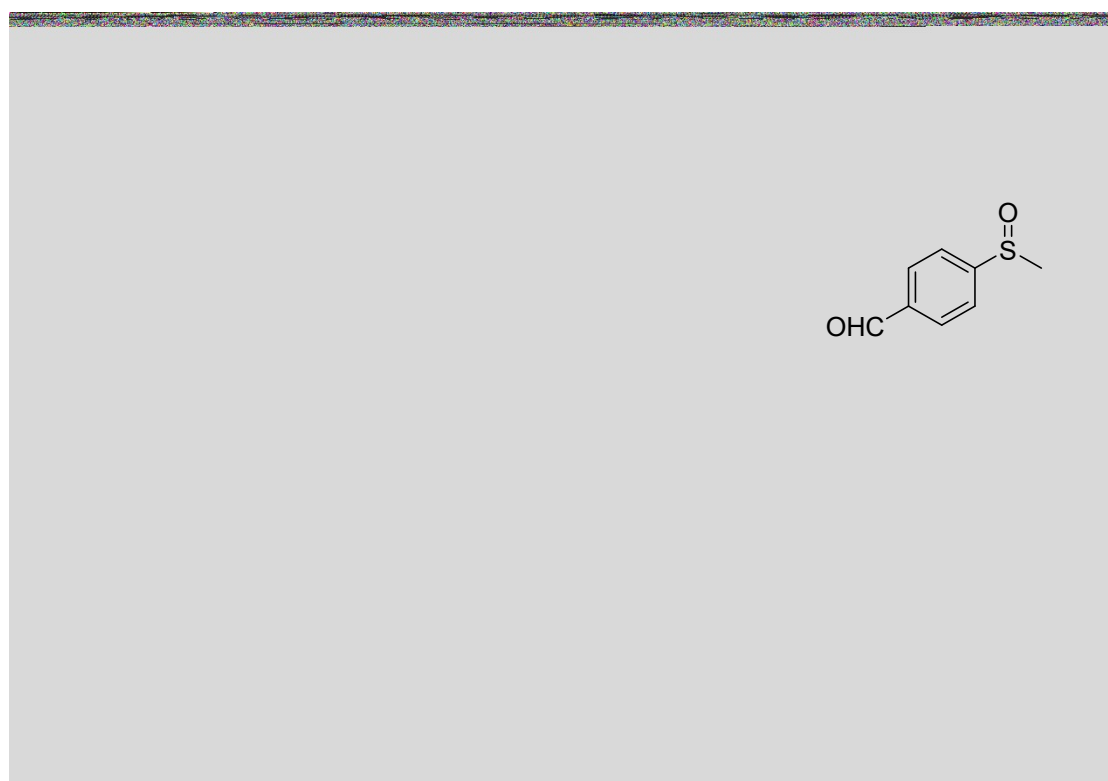

Fig. S26  $^{13}\text{C}$  NMR spectrum of **2g** in  $\text{CDCl}_3$ .

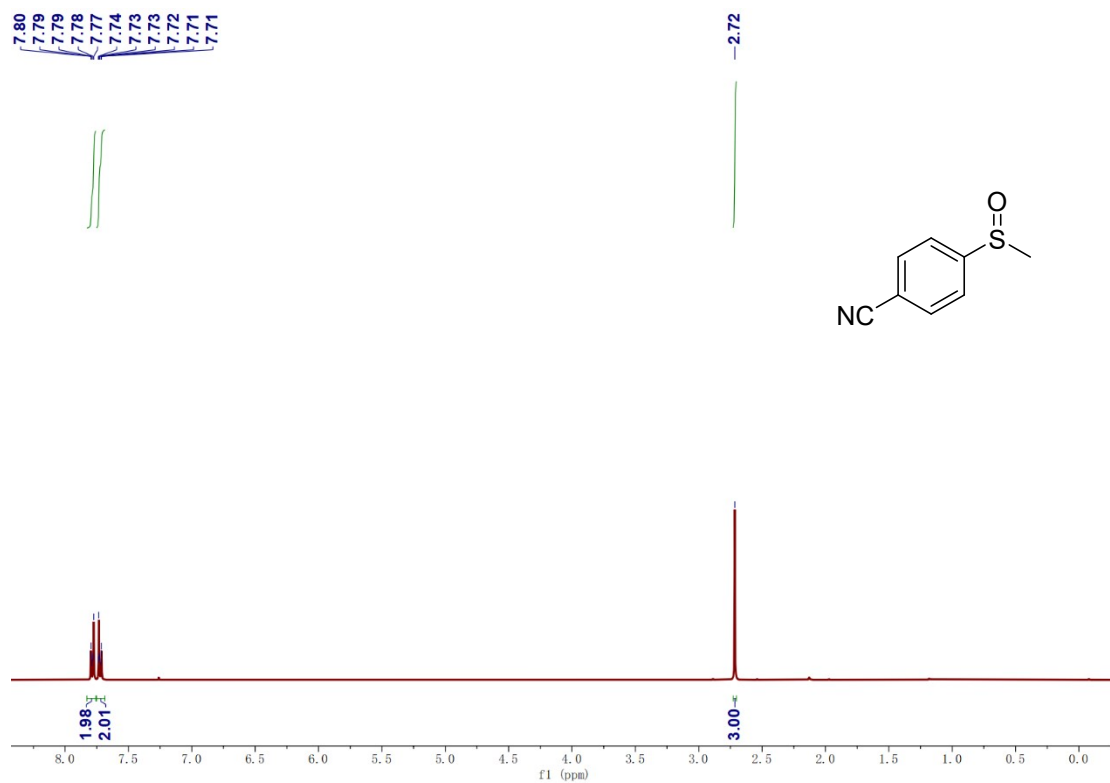

**Fig. S27** <sup>1</sup>H NMR spectrum of **2h** in CDCl<sub>3</sub>.

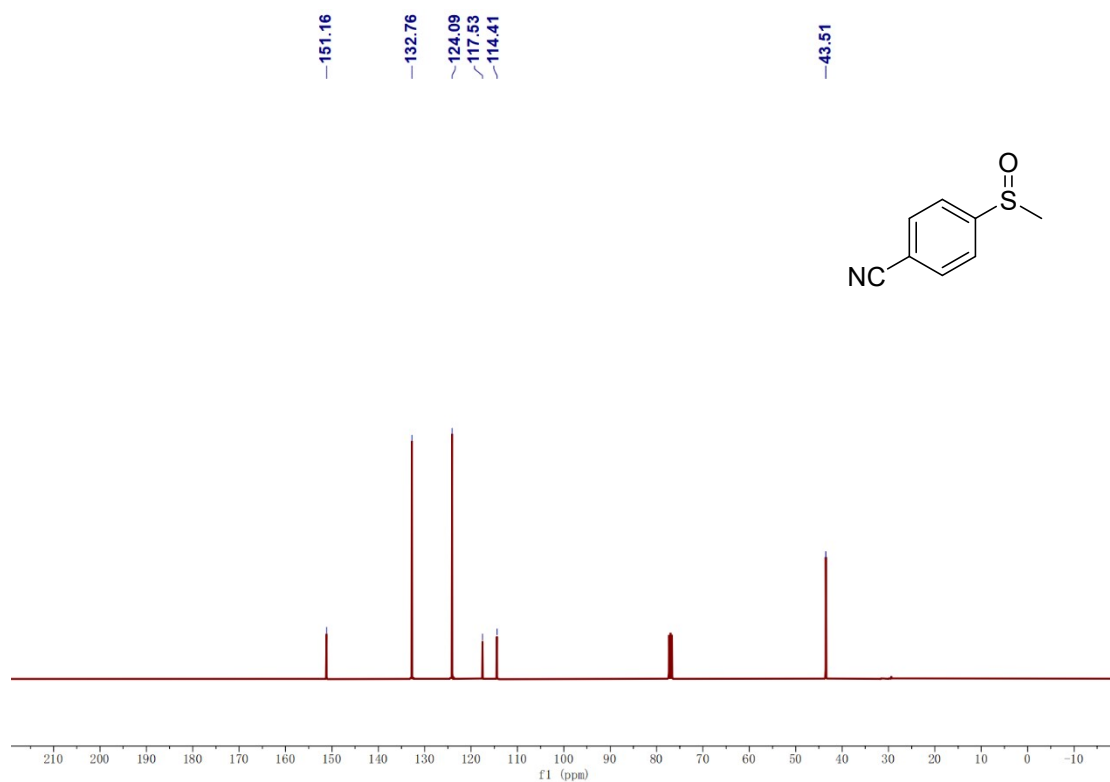

**Fig. S28** <sup>13</sup>C NMR spectrum of **2h** in CDCl<sub>3</sub>.

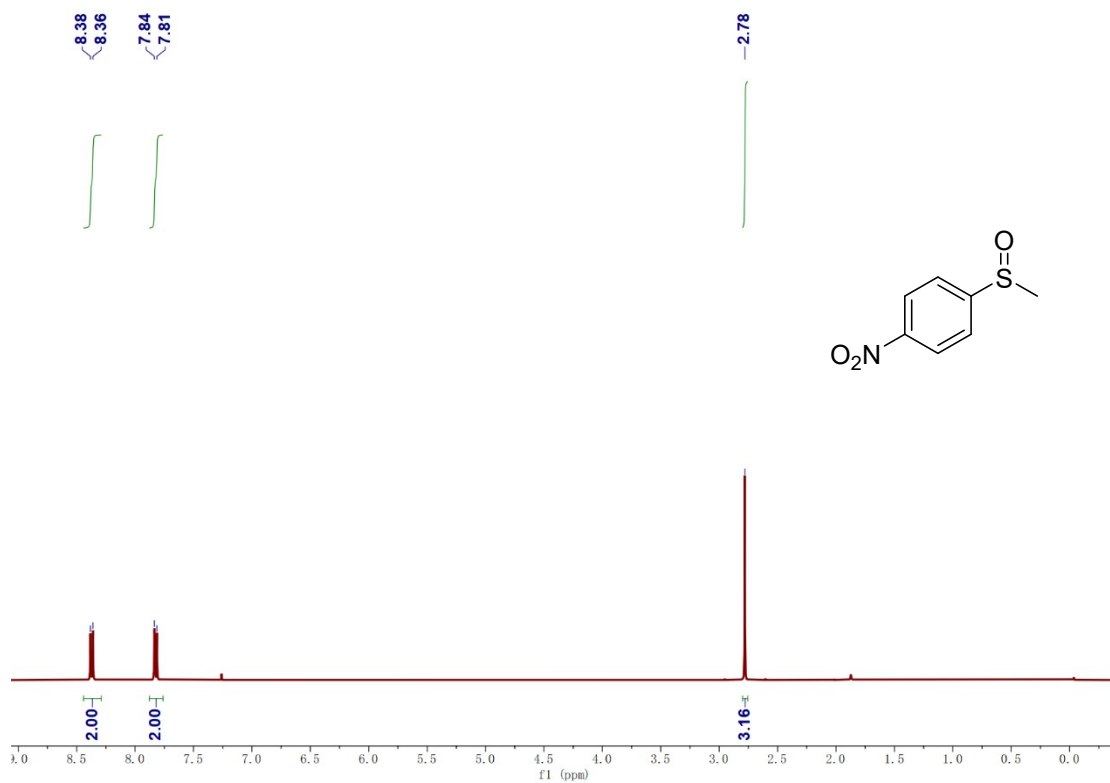

Fig. S29 <sup>1</sup>H NMR spectrum of **2i** in CDCl<sub>3</sub>.

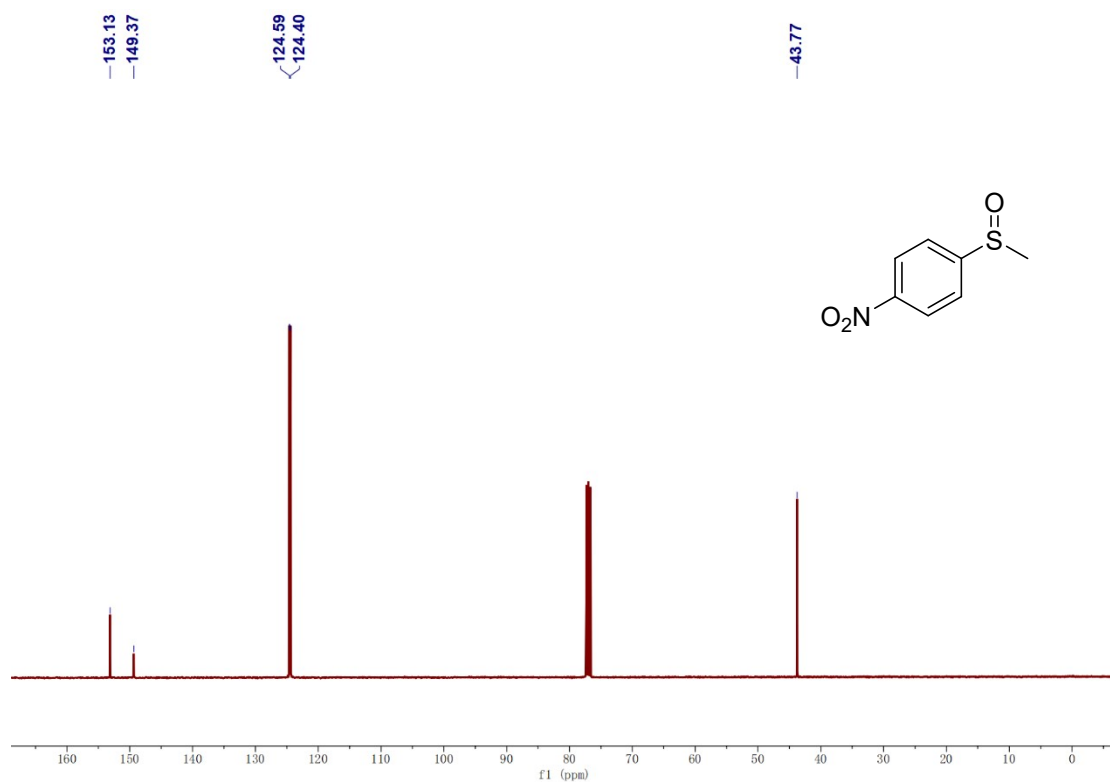

Fig. S30 <sup>13</sup>C NMR spectrum of **2i** in CDCl<sub>3</sub>.

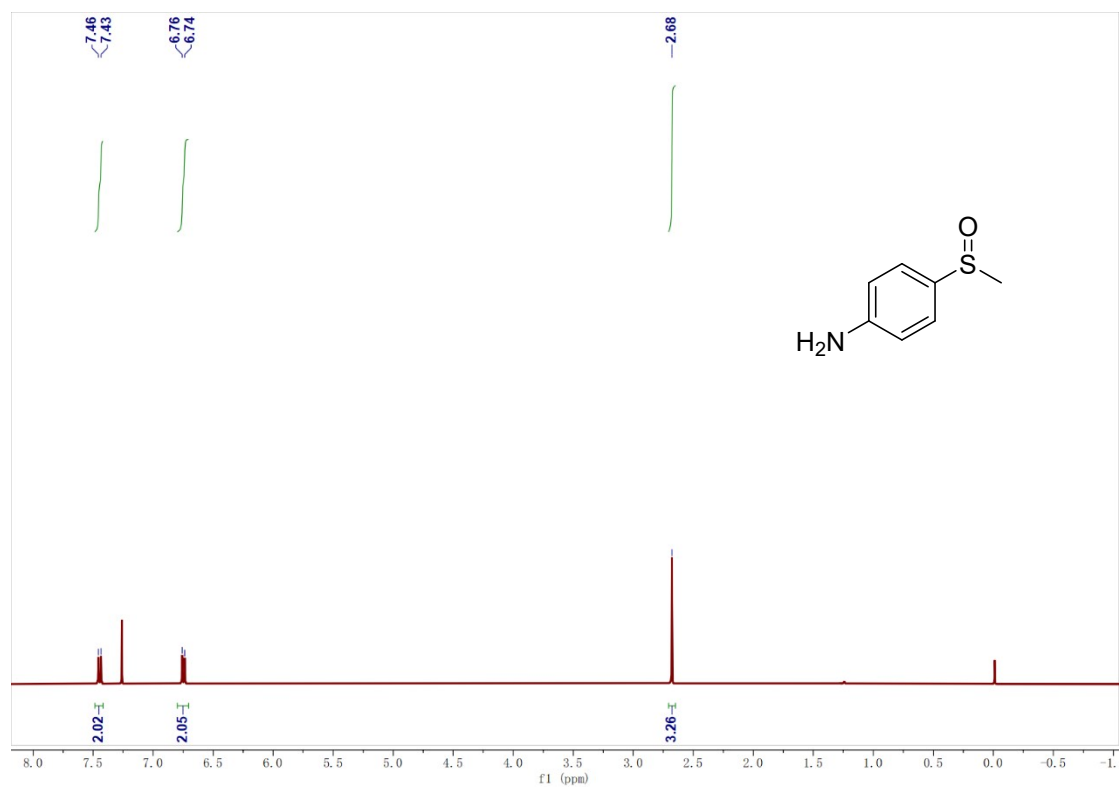

**Fig. S31**  $^1\text{H}$  NMR spectrum of **2j** in  $\text{CDCl}_3$ .

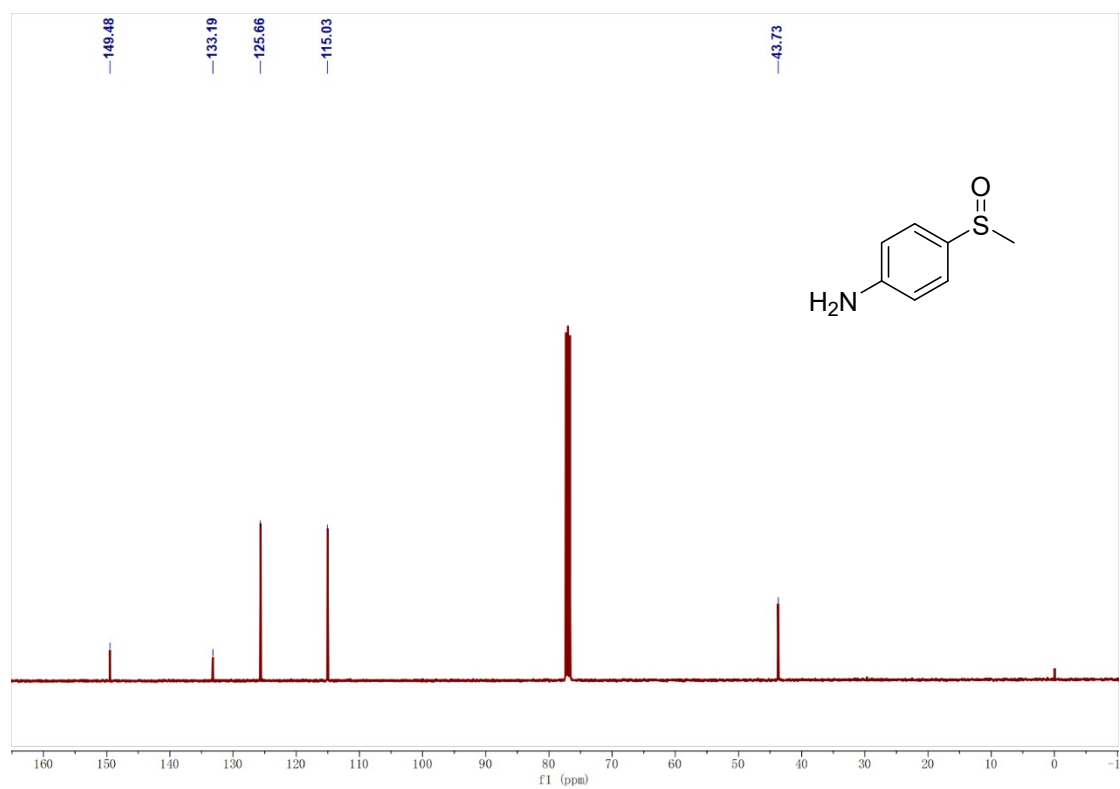

**Fig. S32**  $^{13}\text{C}$  NMR spectrum of **2j** in  $\text{CDCl}_3$ .

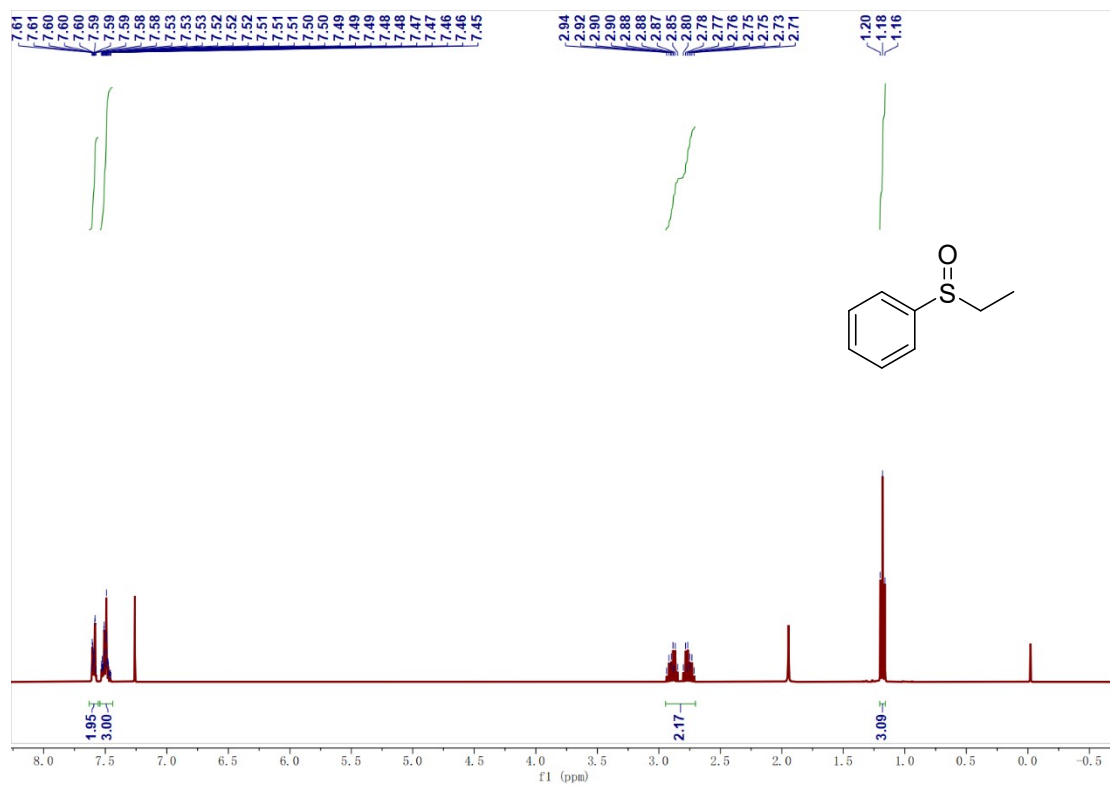

Fig. S33  $^1\text{H}$  NMR spectrum of **2k** in  $\text{CDCl}_3$ .

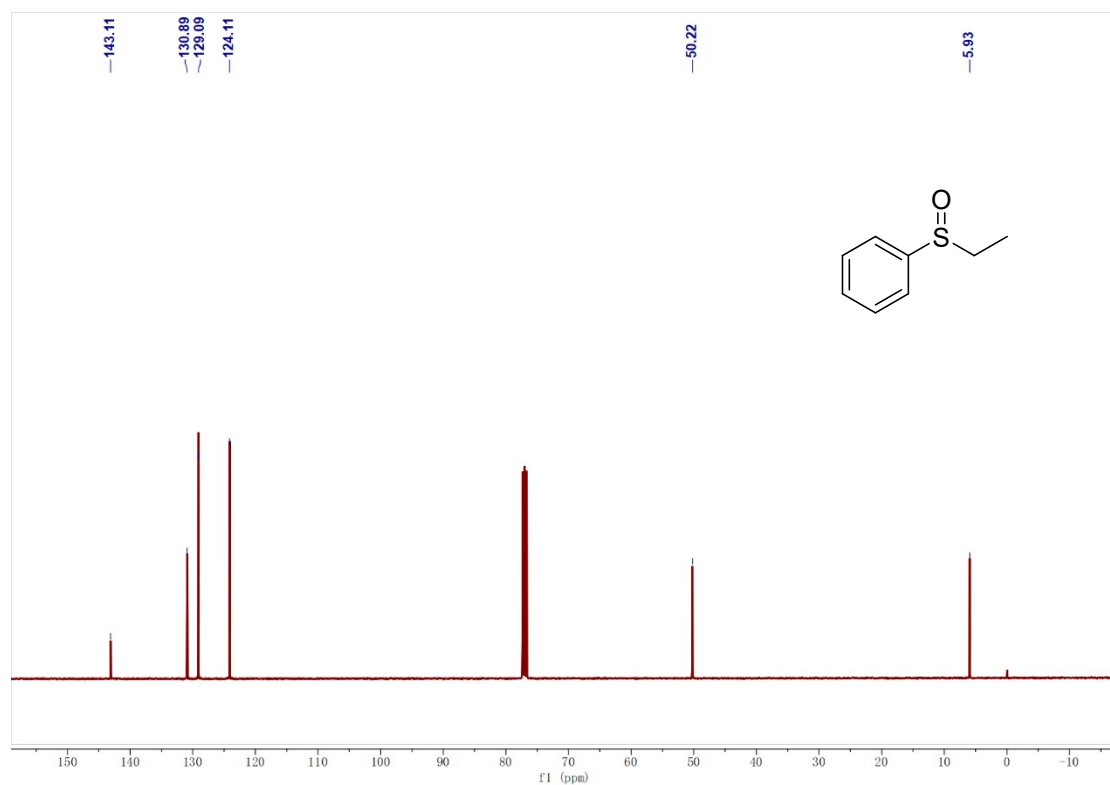

Fig. S34  $^{13}\text{C}$  NMR spectrum of **2k** in  $\text{CDCl}_3$ .

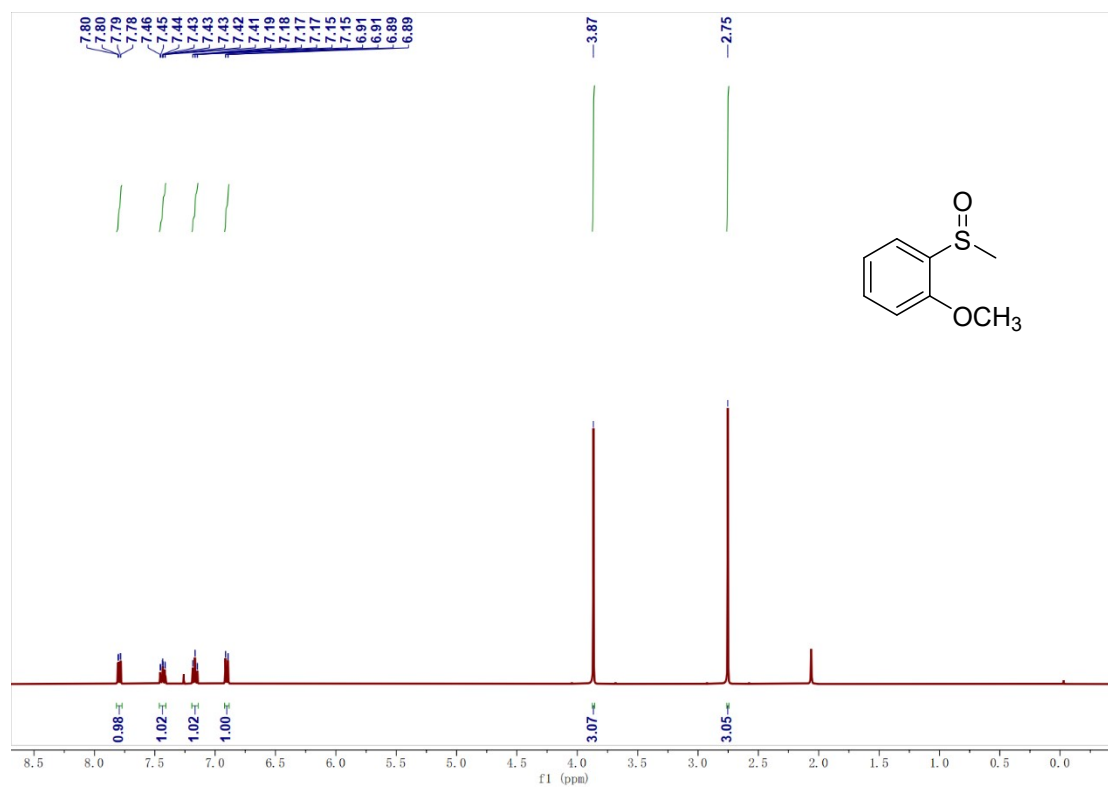

**Fig. S35**  $^1\text{H}$  NMR spectrum of **2I** in  $\text{CDCl}_3$ .

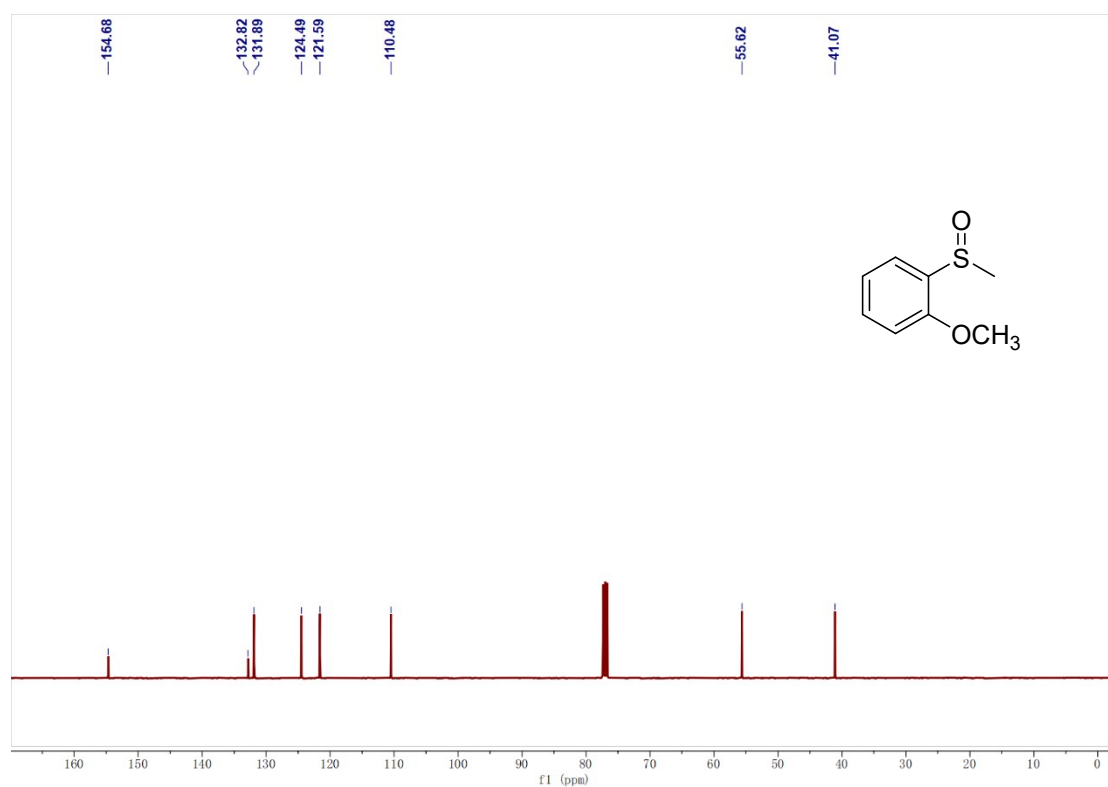

**Fig. S36**  $^{13}\text{C}$  NMR spectrum of **2I** in  $\text{CDCl}_3$ .

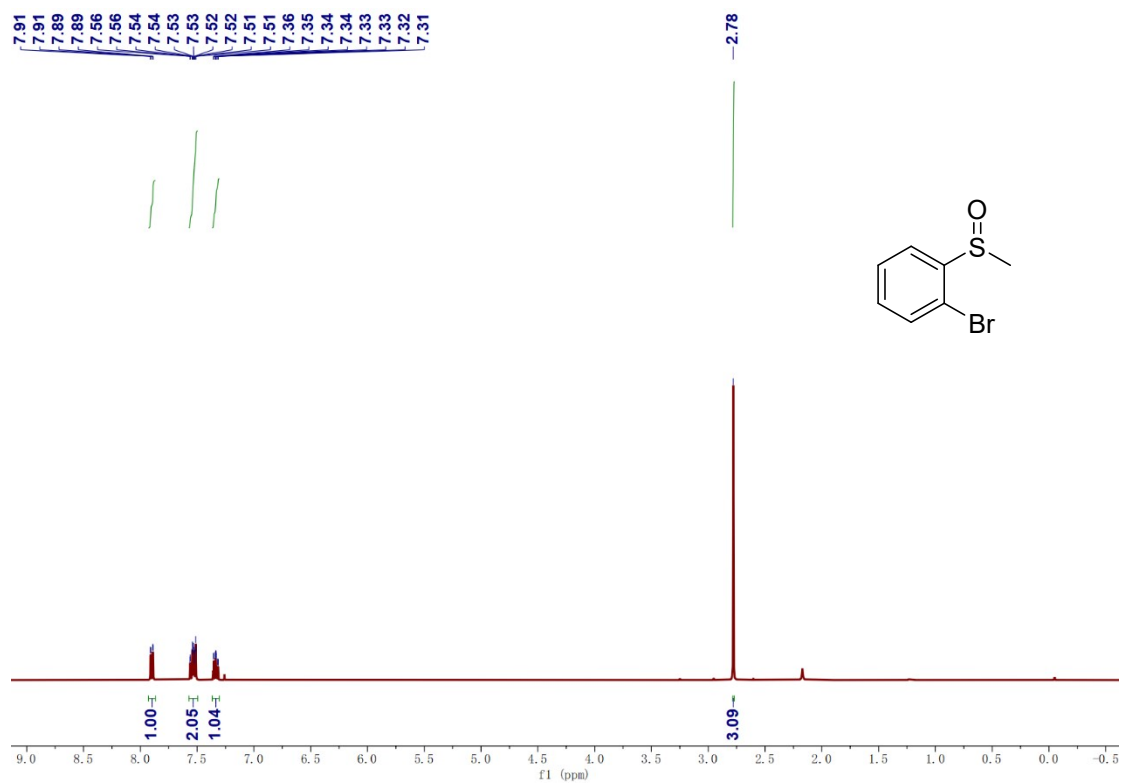

**Fig. S37**  $^1\text{H}$  NMR spectrum of **2m** in  $\text{CDCl}_3$ .

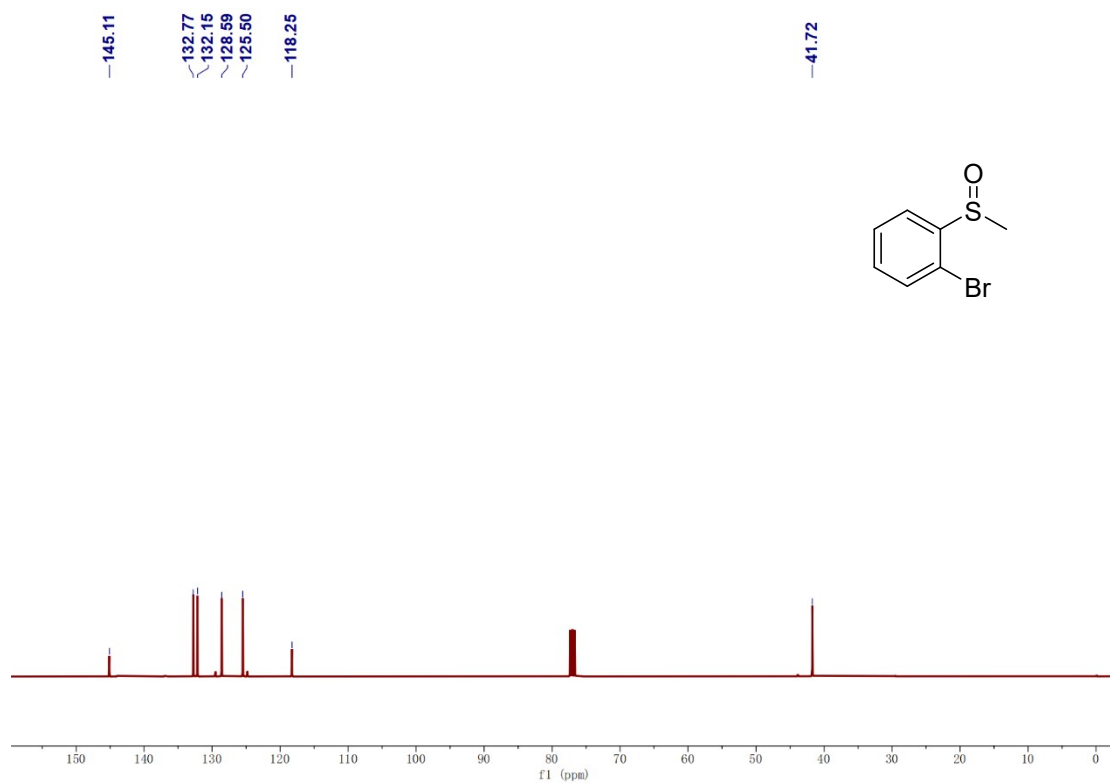

**Fig. S38**  $^{13}\text{C}$  NMR spectrum of **2m** in  $\text{CDCl}_3$ .

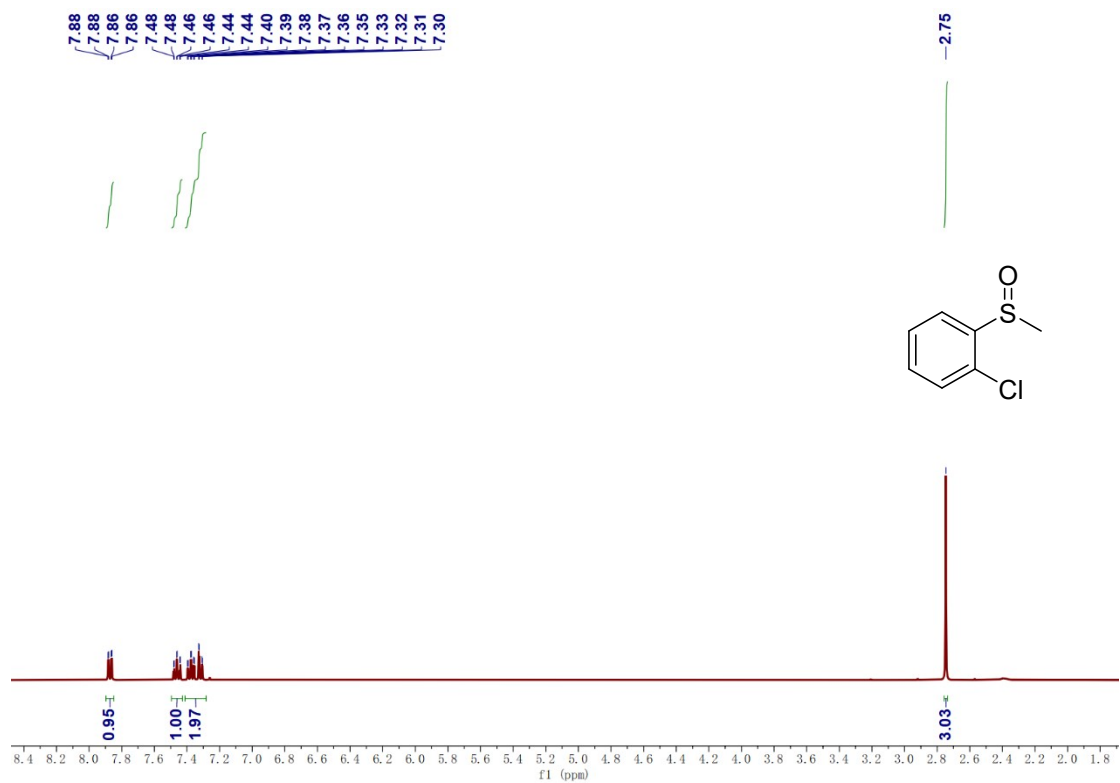

**Fig. S39** <sup>1</sup>H NMR spectrum of **2n** in CDCl<sub>3</sub>.

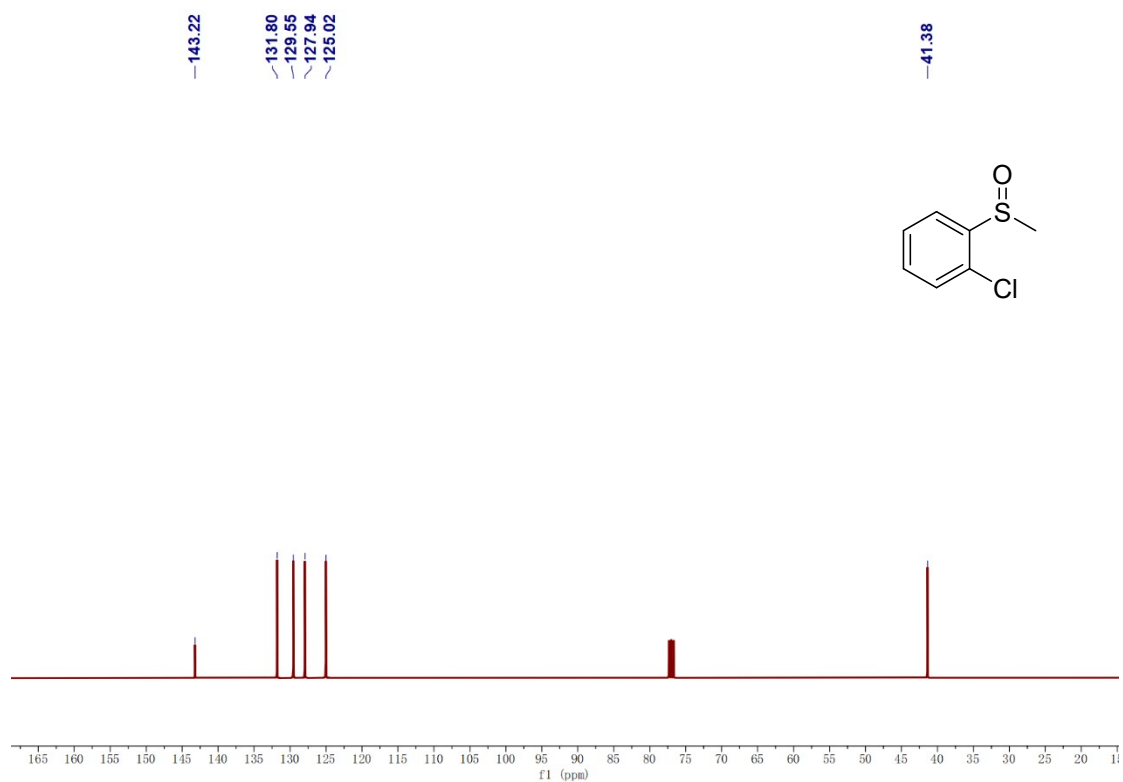

**Fig. S40** <sup>13</sup>C NMR spectrum of **2n** in CDCl<sub>3</sub>.



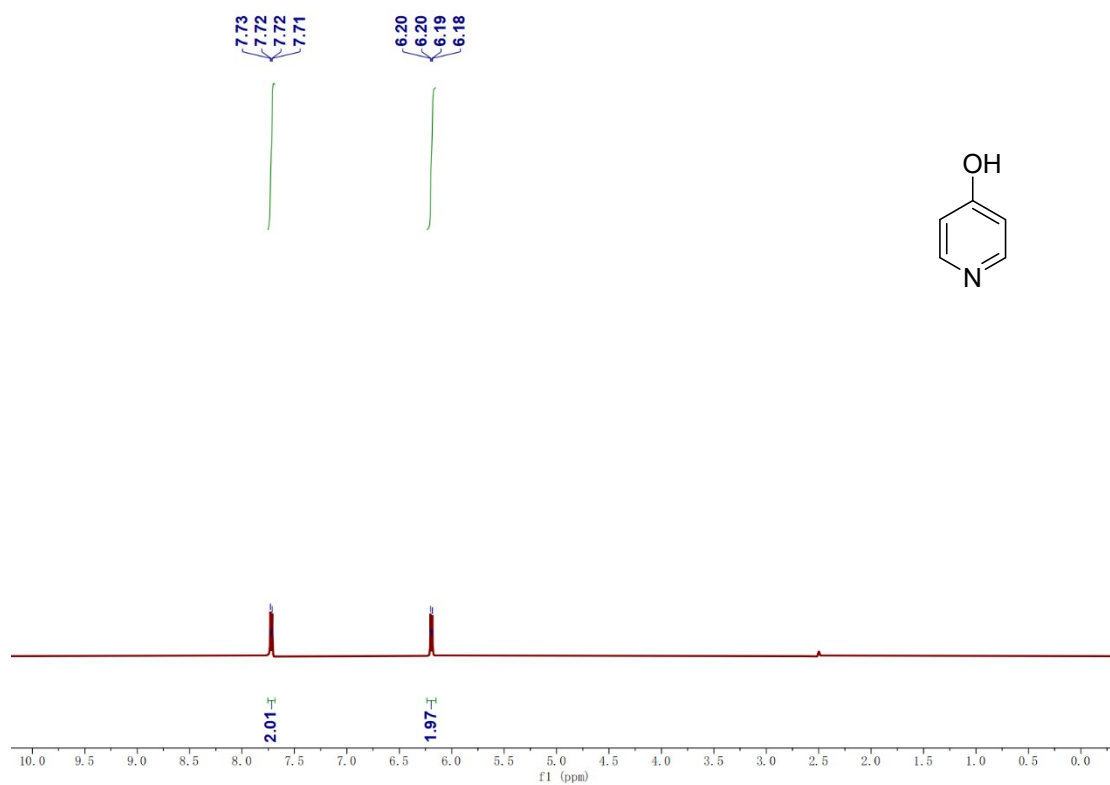

Fig. S41  $^1\text{H}$  NMR spectrum of **4a** in  $\text{DMSO-}d_6$ .

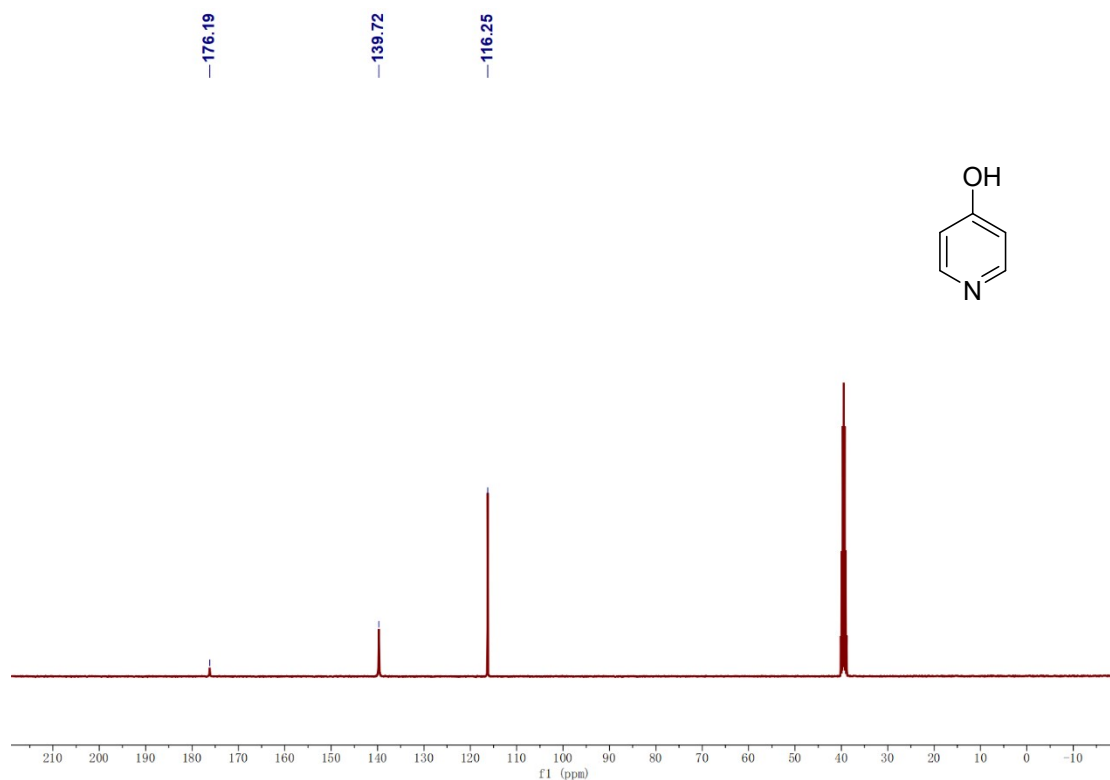

Fig. S42  $^{13}\text{C}$  NMR spectrum of **4a** in  $\text{DMSO-}d_6$ .

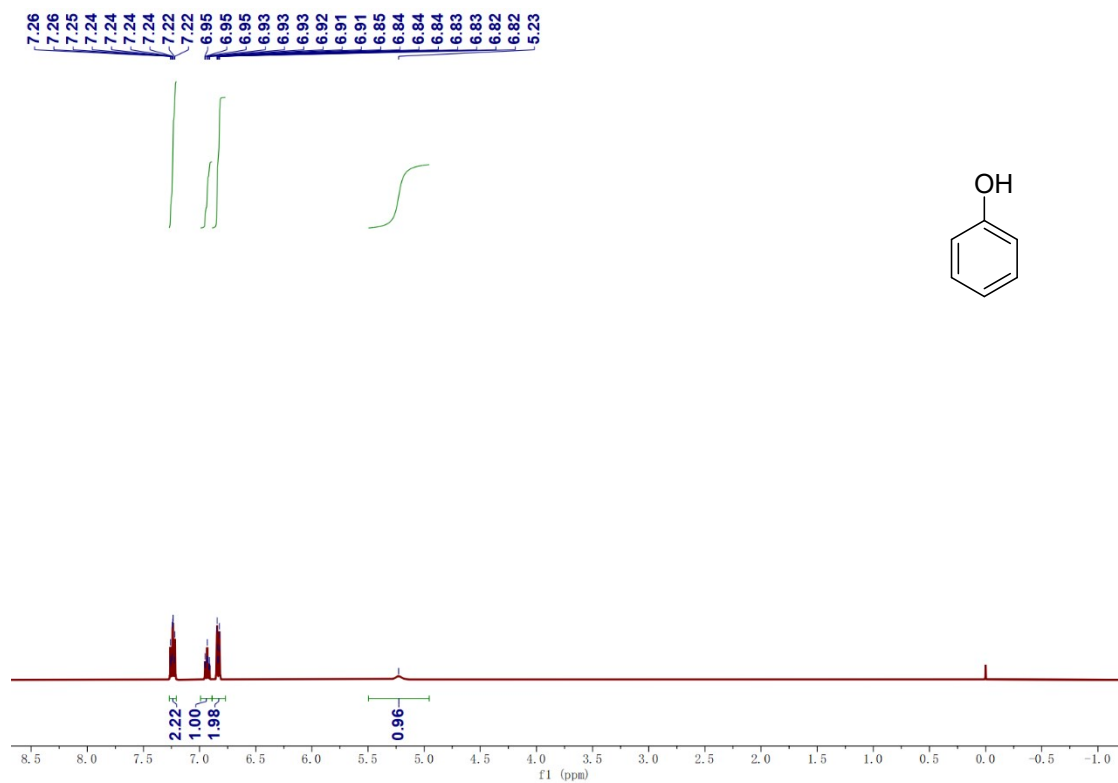

**Fig. S43**  $^1\text{H}$  NMR spectrum of **4b** in  $\text{CDCl}_3$ .

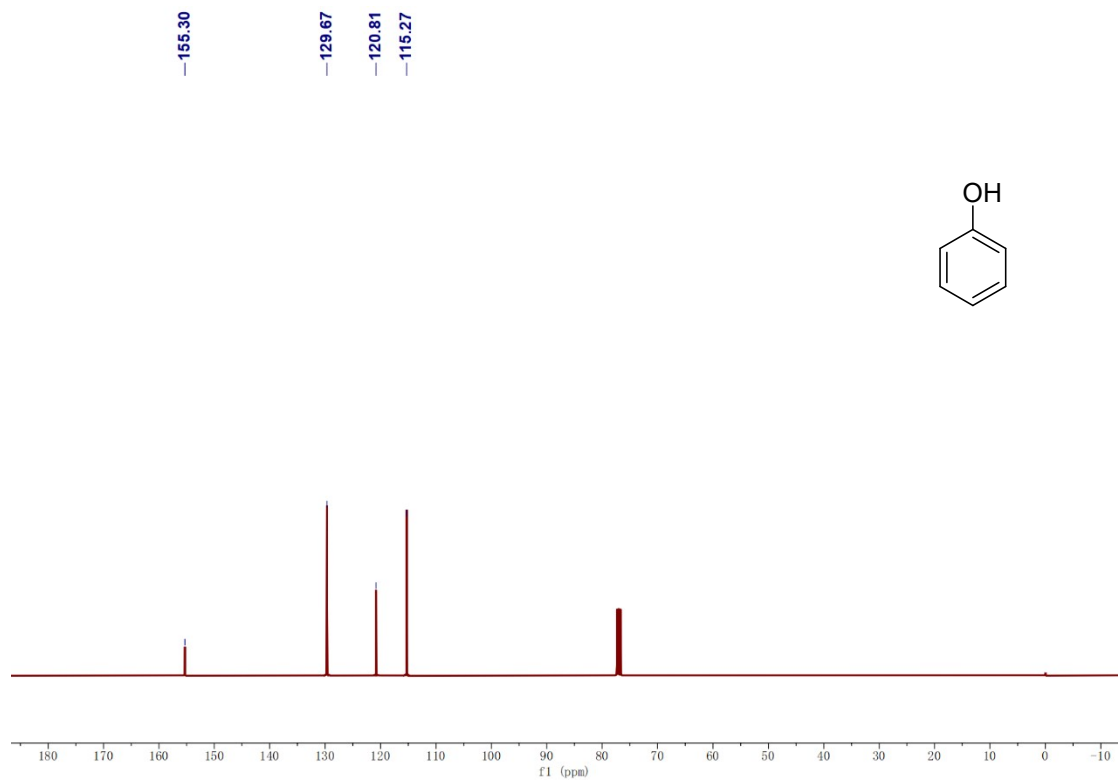

**Fig. S44**  $^{13}\text{C}$  NMR spectrum of **4b** in  $\text{CDCl}_3$ .

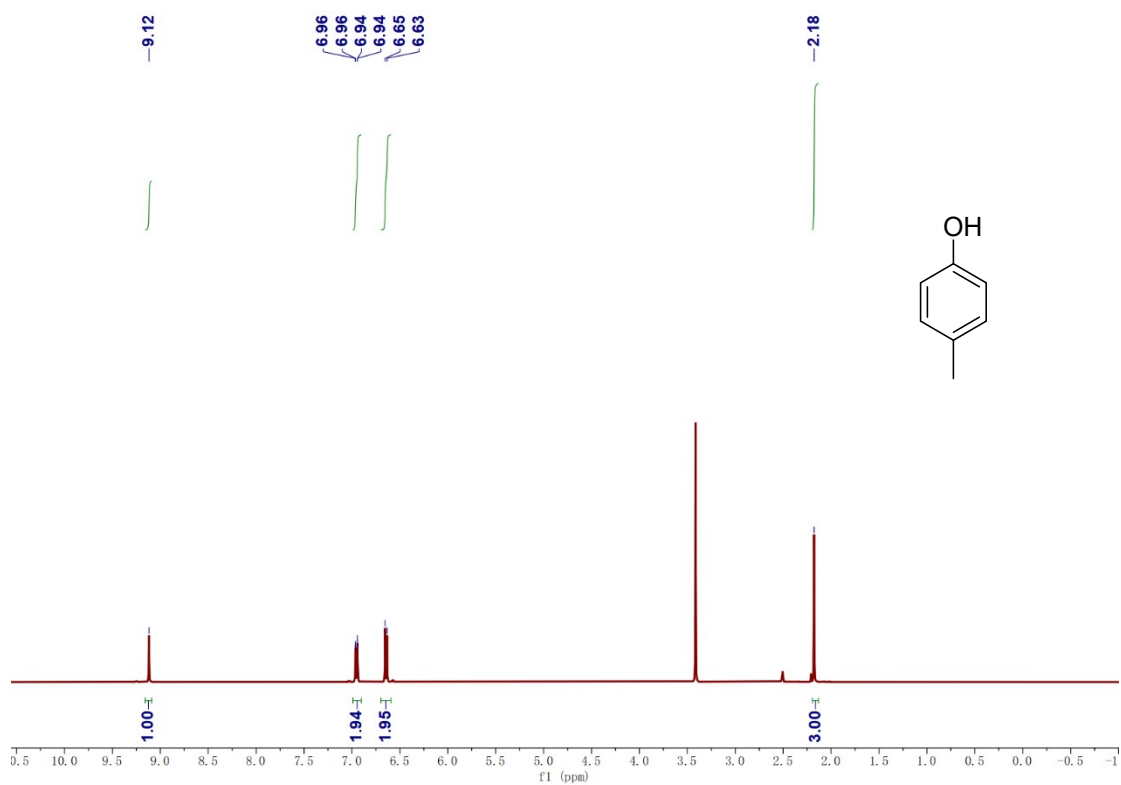

**Fig. S45**  $^1\text{H}$  NMR spectrum of **4c** in  $\text{DMSO-}d_6$ .

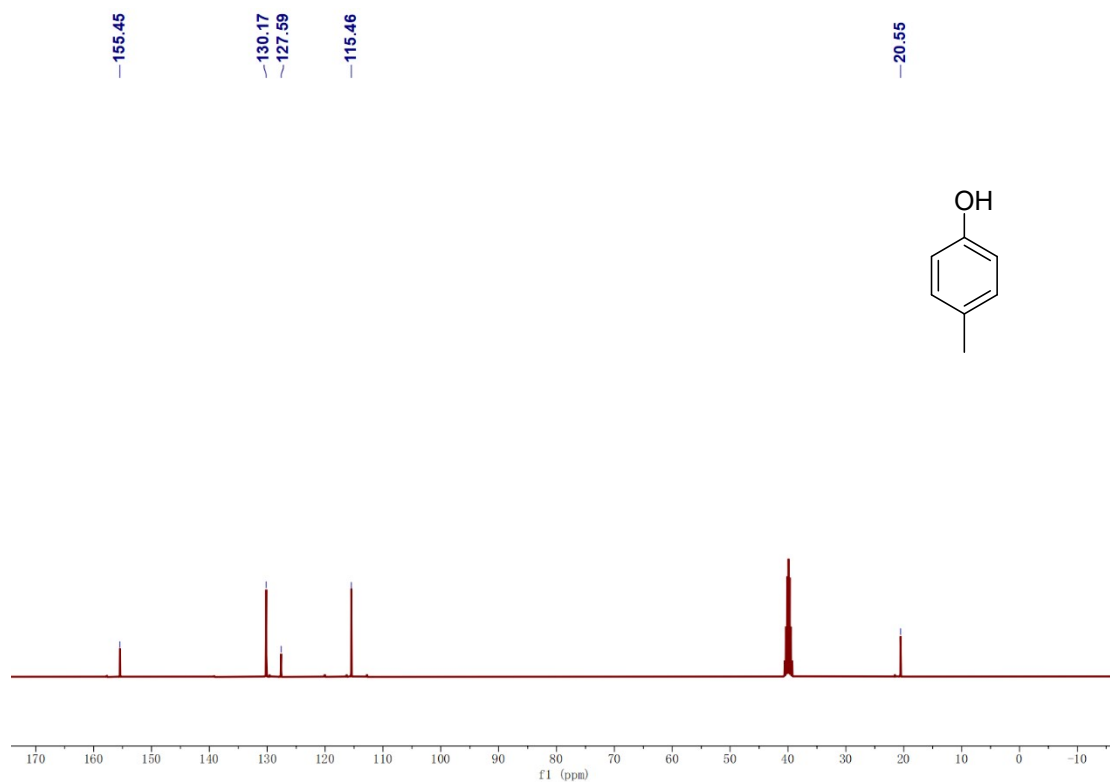

**Fig. S46**  $^{13}\text{C}$  NMR spectrum of **4c** in  $\text{DMSO-}d_6$ .

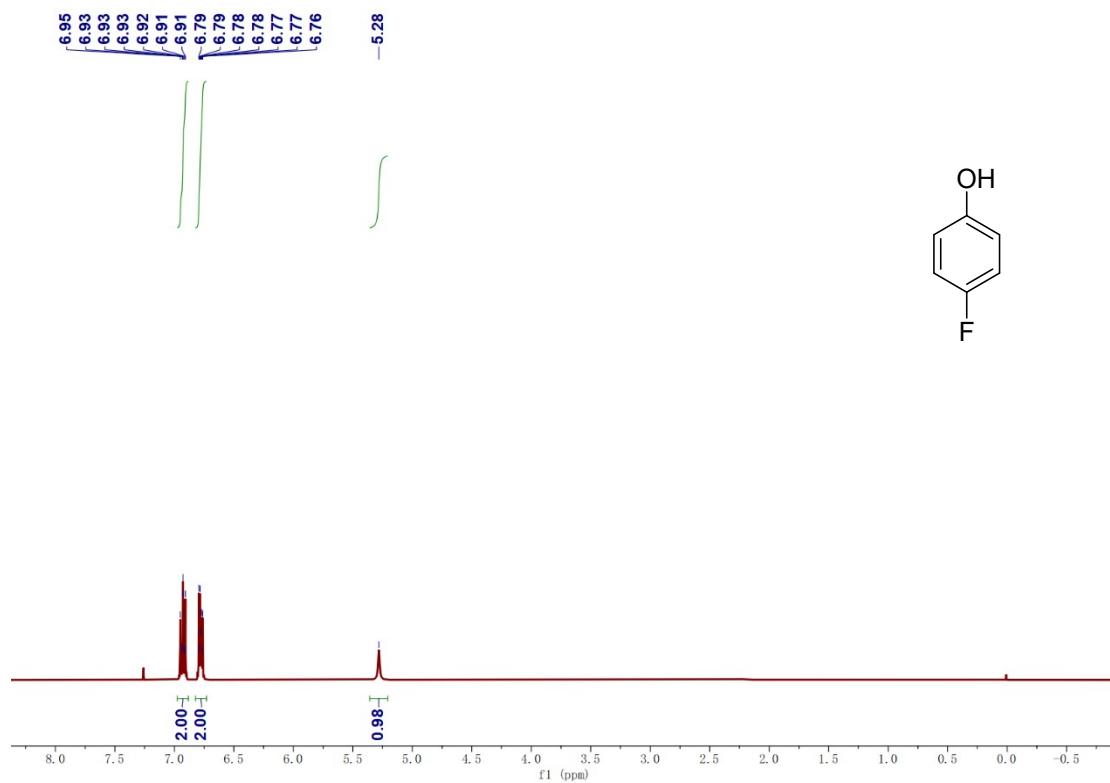

Fig. S47  $^1\text{H}$  NMR spectrum of **4d** in  $\text{CDCl}_3$ .

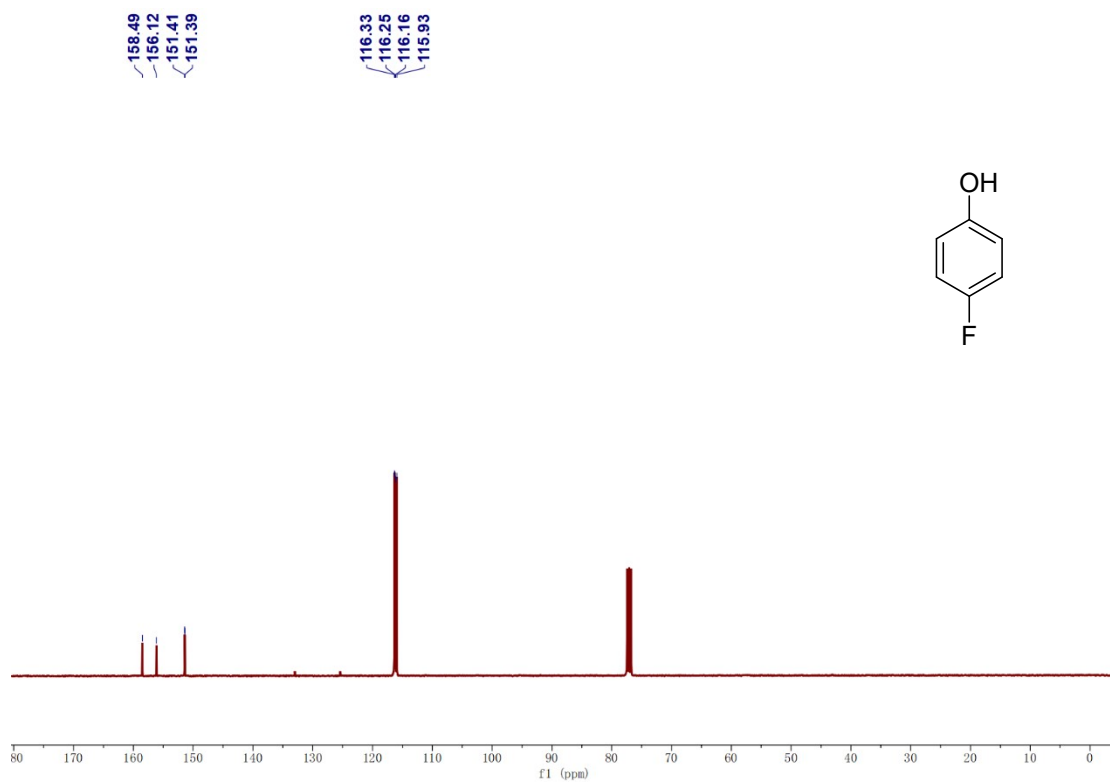

Fig. S48  $^{13}\text{C}$  NMR spectrum of **4d** in  $\text{CDCl}_3$ .

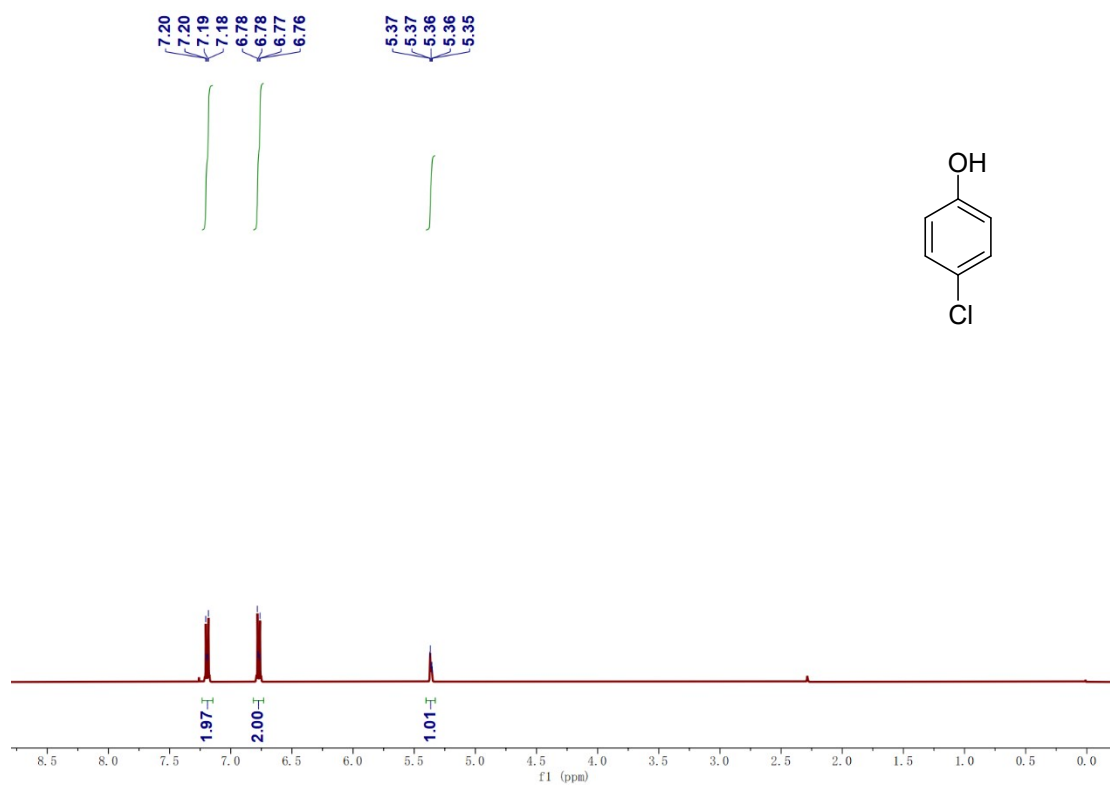

**Fig. S49** <sup>1</sup>H NMR spectrum of **4e** in CDCl<sub>3</sub>.

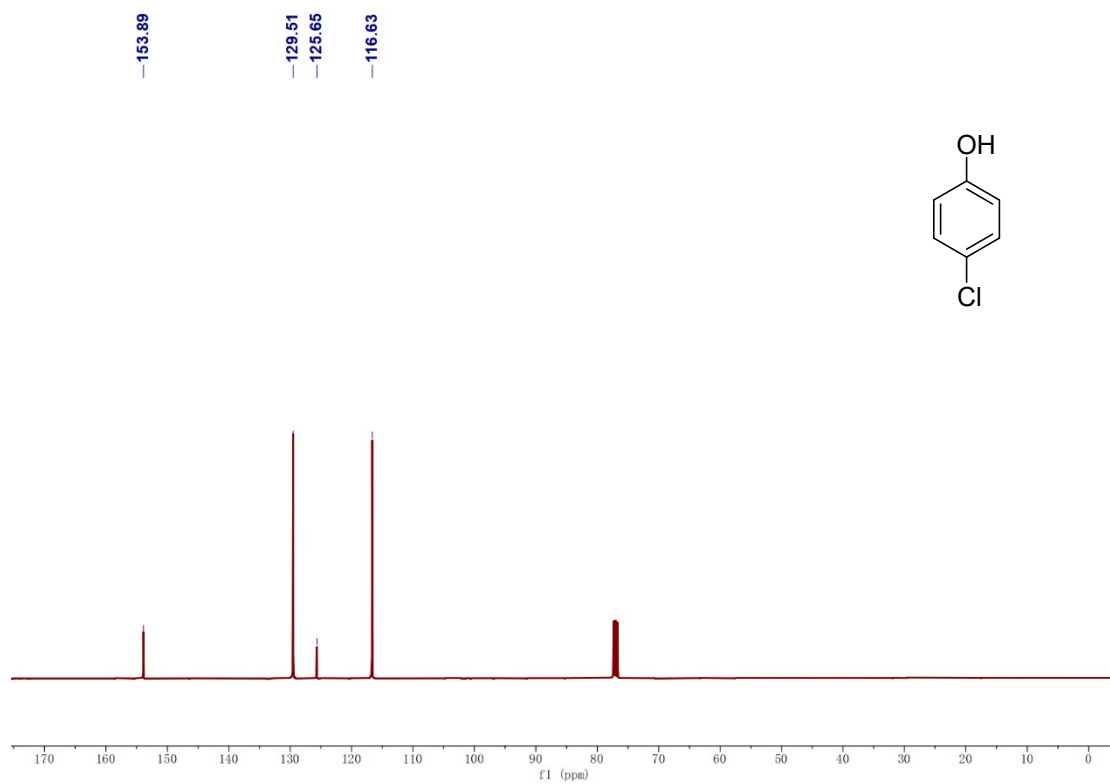

**Fig. S50** <sup>13</sup>C NMR spectrum of **4e** in CDCl<sub>3</sub>.

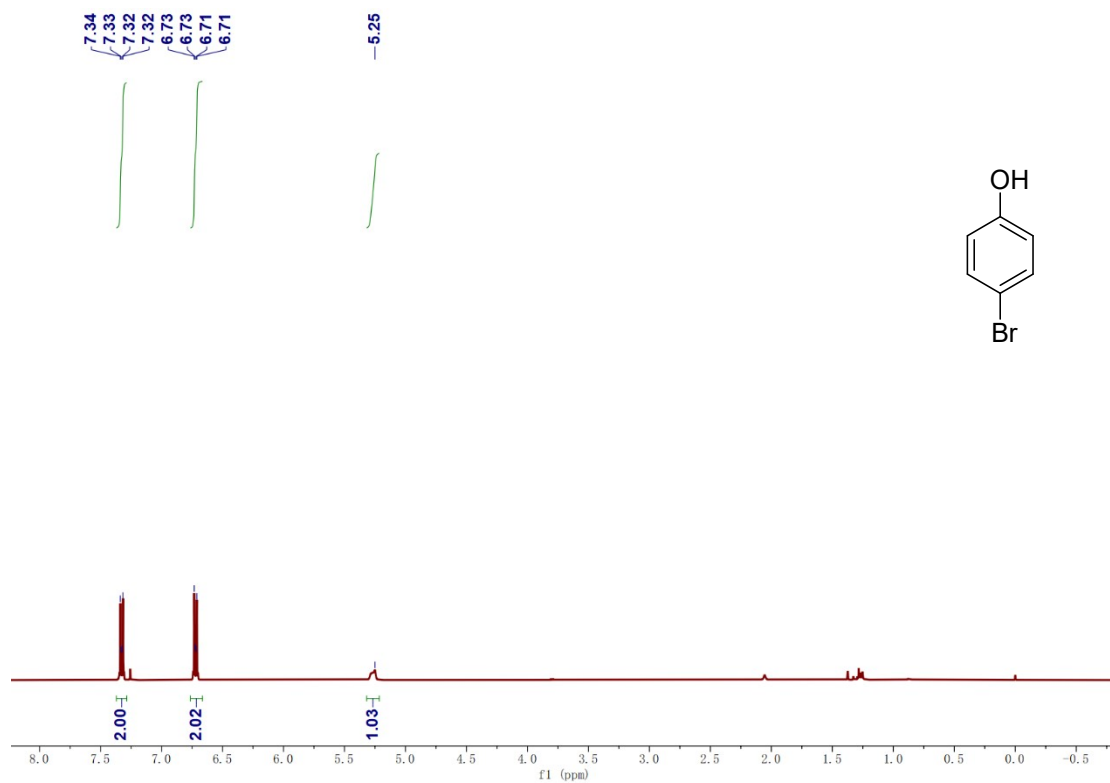

**Fig. S51**  $^1\text{H NMR}$  spectrum of **4f** in  $\text{CDCl}_3$ .

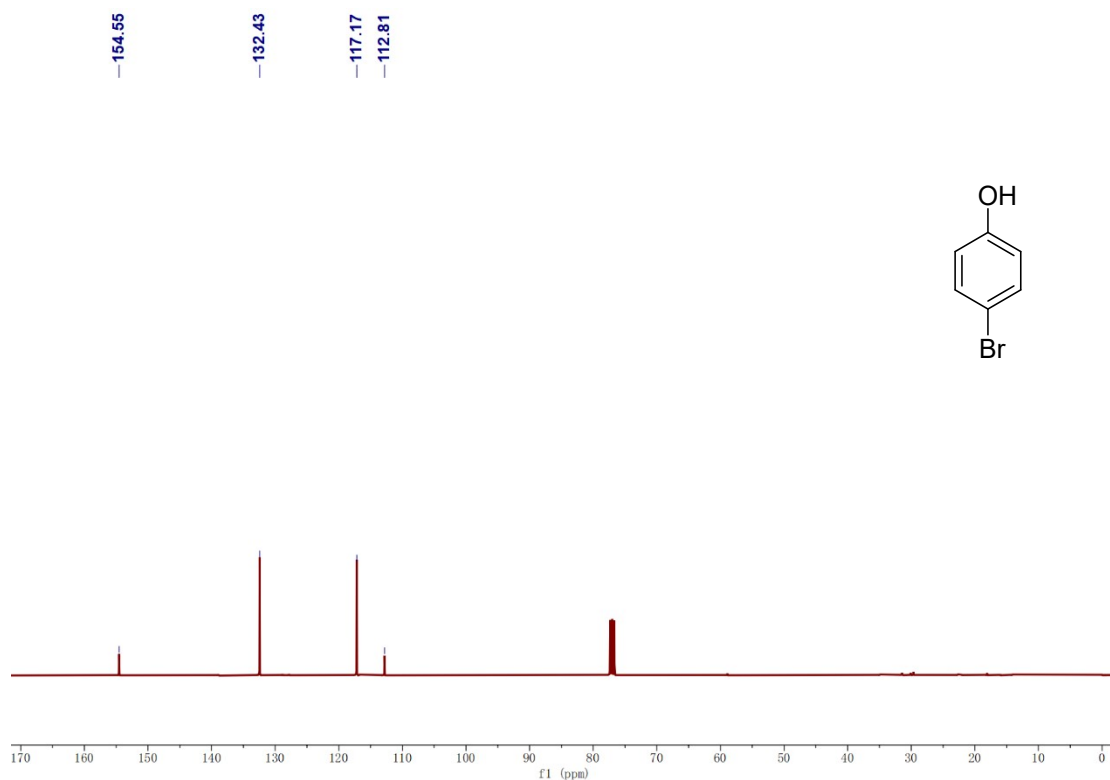

**Fig. S52**  $^{13}\text{C NMR}$  spectrum of **4f** in  $\text{CDCl}_3$ .

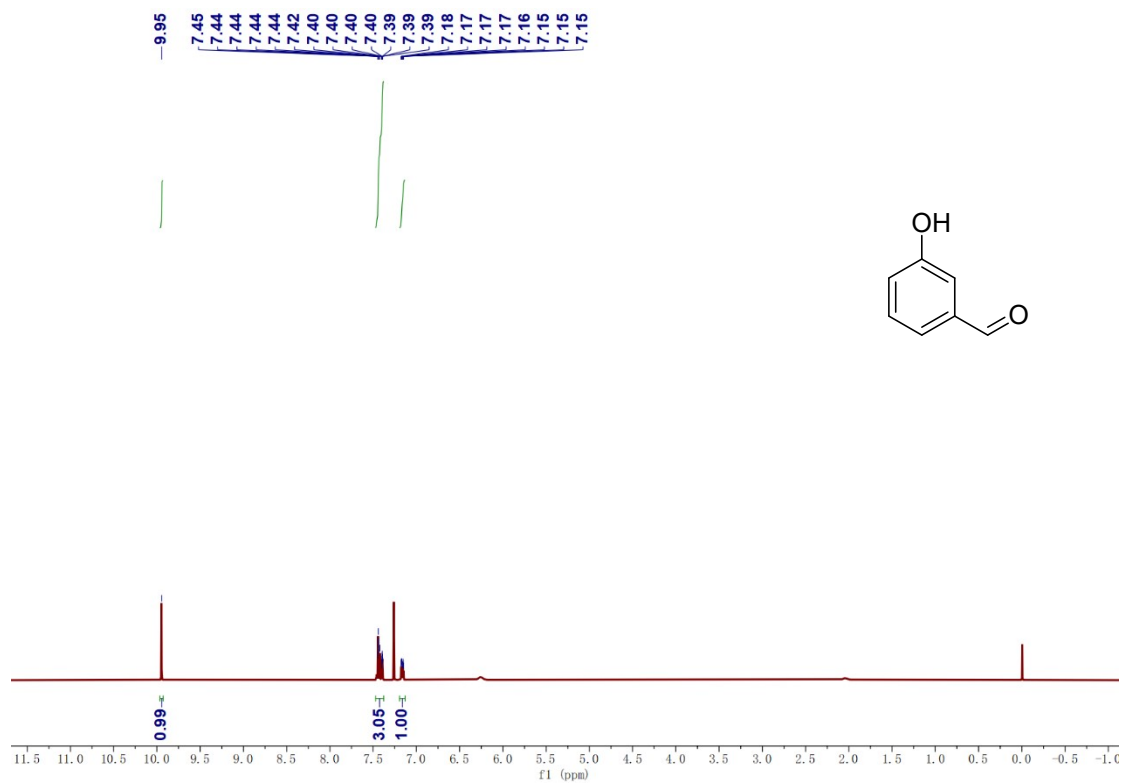

Fig. S53  $^1\text{H}$  NMR spectrum of **4g** in  $\text{CDCl}_3$ .

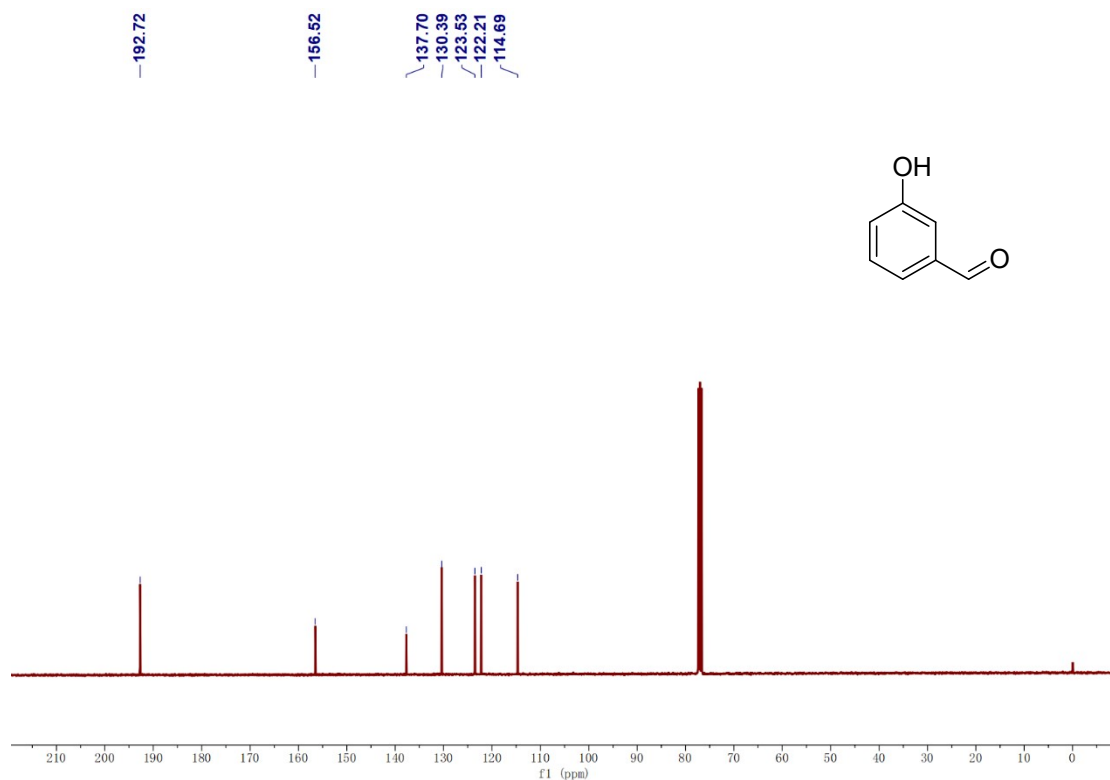

Fig. S54  $^{13}\text{C}$  NMR spectrum of **4g** in  $\text{CDCl}_3$ .

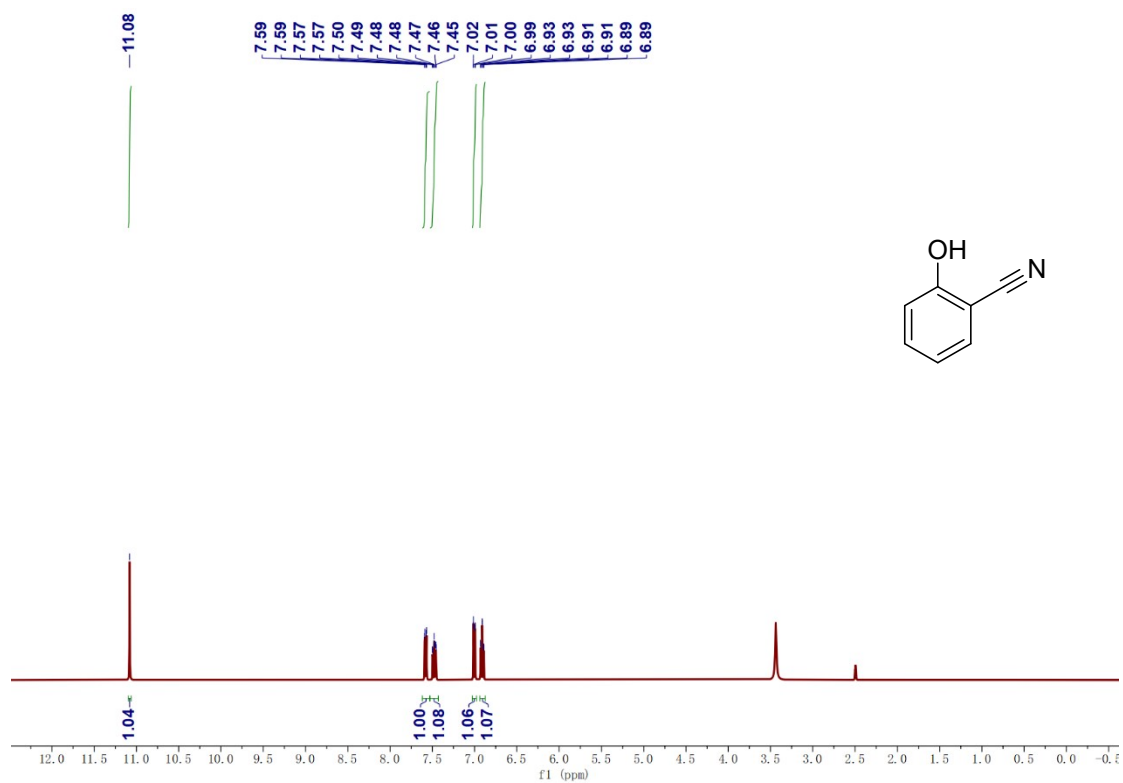

Fig. S55 <sup>1</sup>H NMR spectrum of 4h in DMSO-*d*<sub>6</sub>.

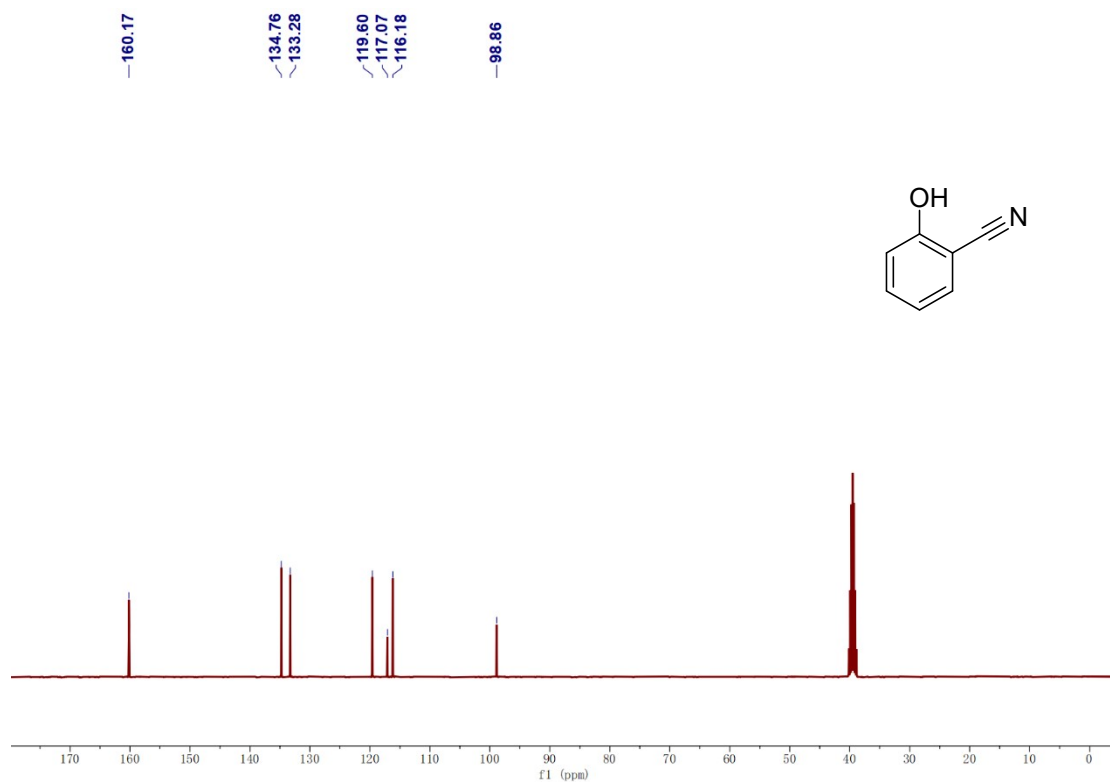

Fig. S56 <sup>13</sup>C NMR spectrum of 4h in DMSO-*d*<sub>6</sub>.



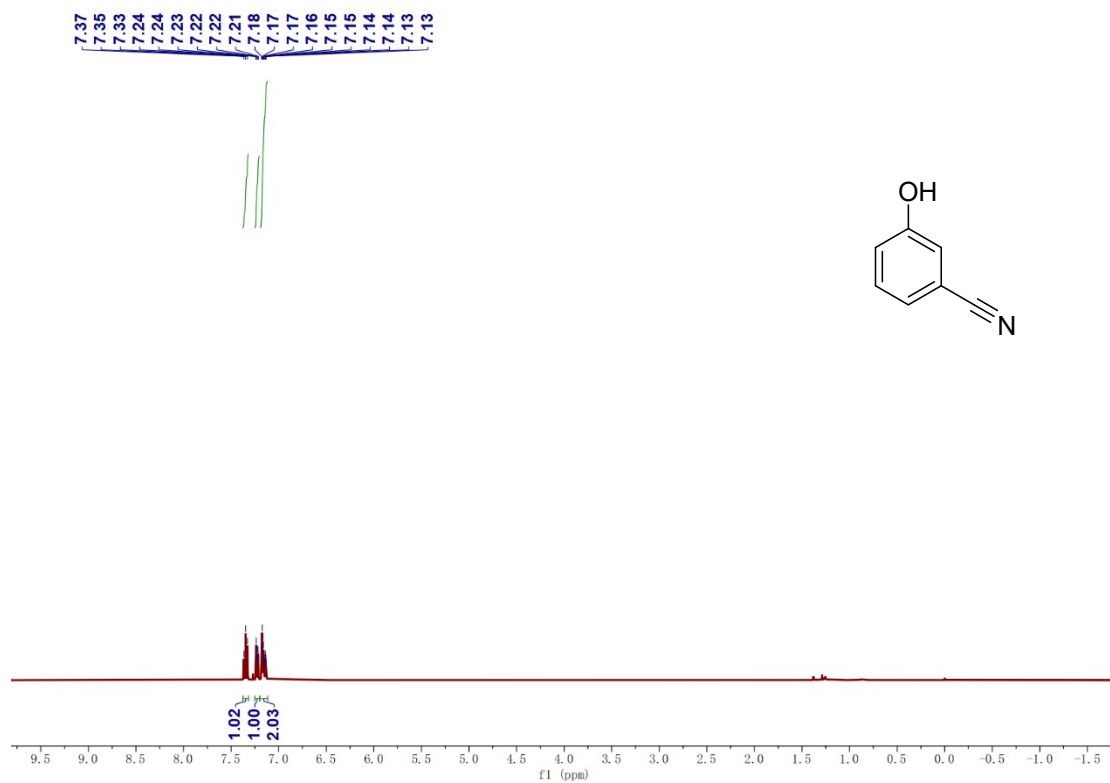

**Fig. S57** <sup>1</sup>H NMR spectrum of **4i** in CDCl<sub>3</sub>.

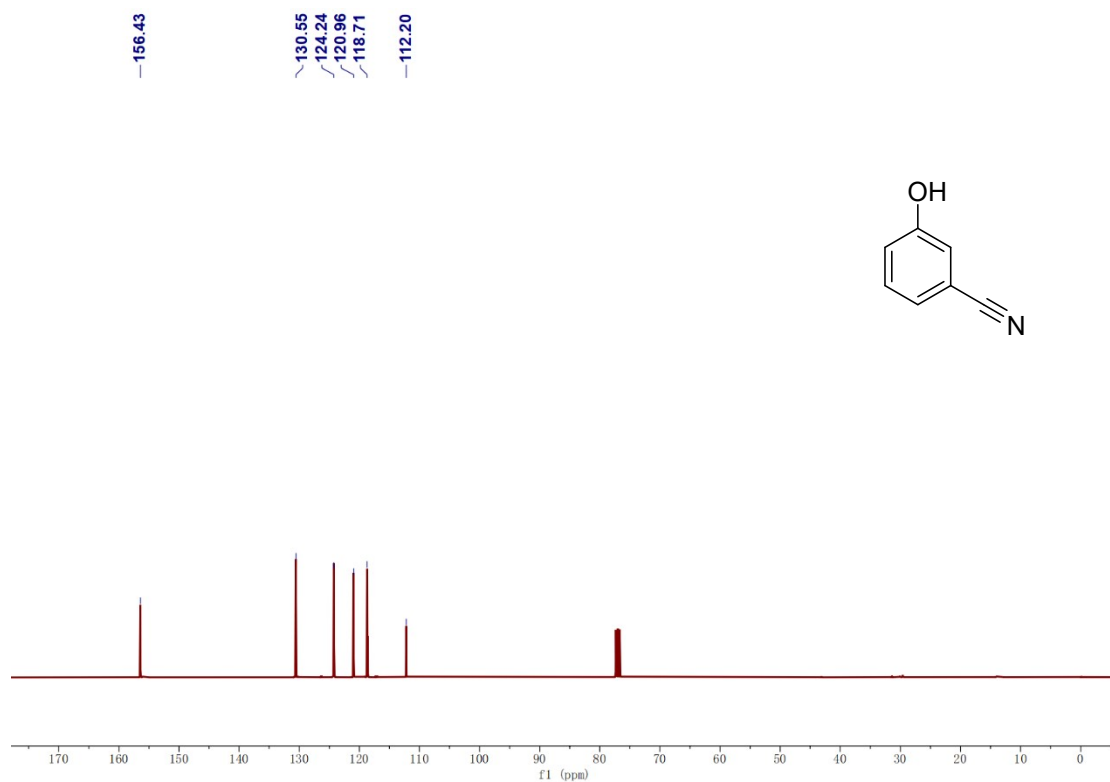

**Fig. S58** <sup>13</sup>C NMR spectrum of **4i** in CDCl<sub>3</sub>.

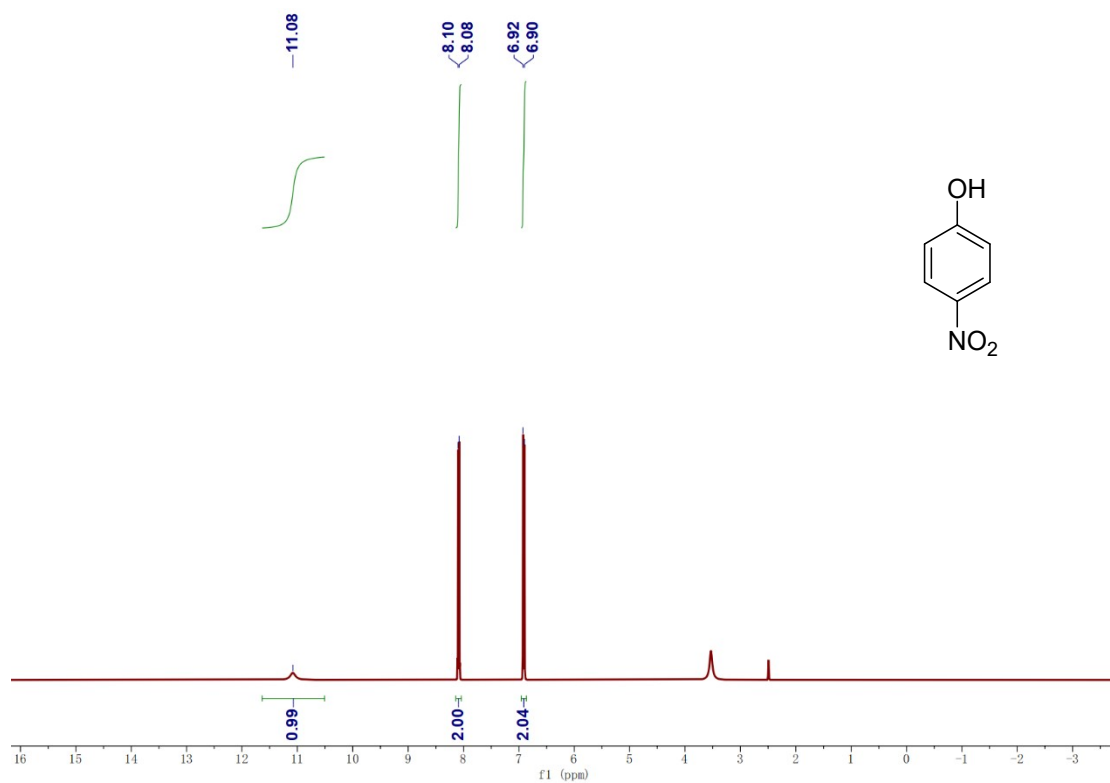

Fig. S59  $^1\text{H}$  NMR spectrum of **4j** in  $\text{DMSO-}d_6$ .

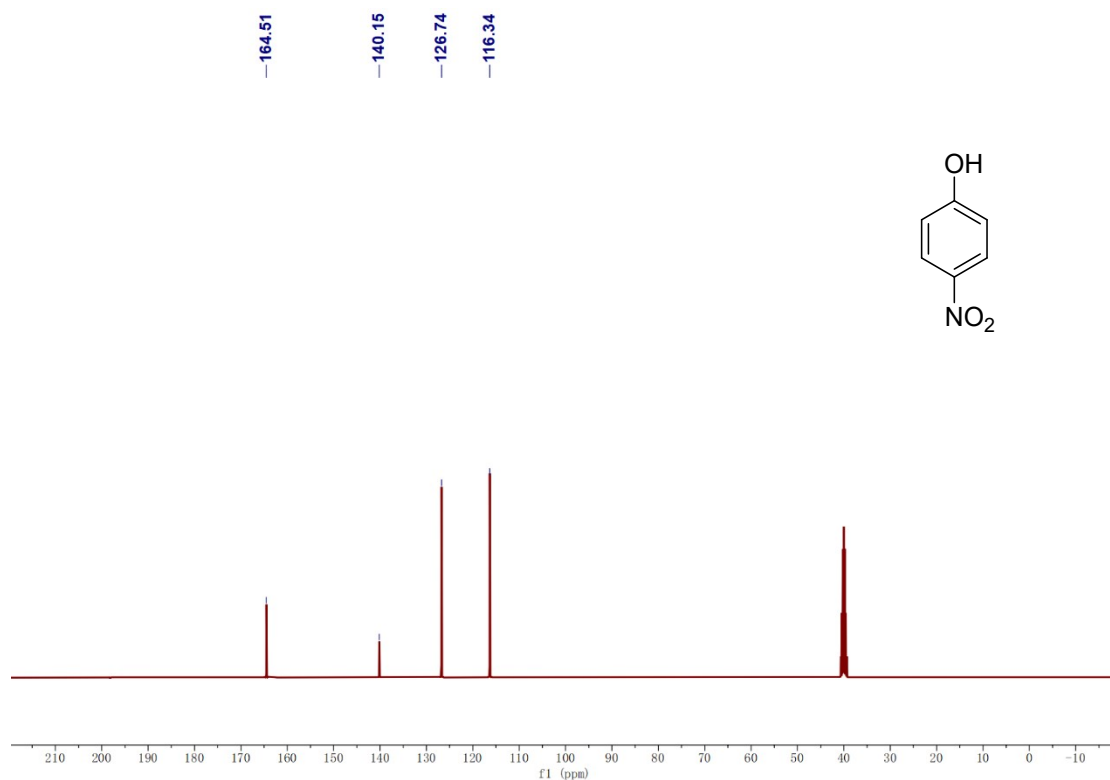

Fig. S60  $^{13}\text{C}$  NMR spectrum of **4j** in  $\text{DMSO-}d_6$ .

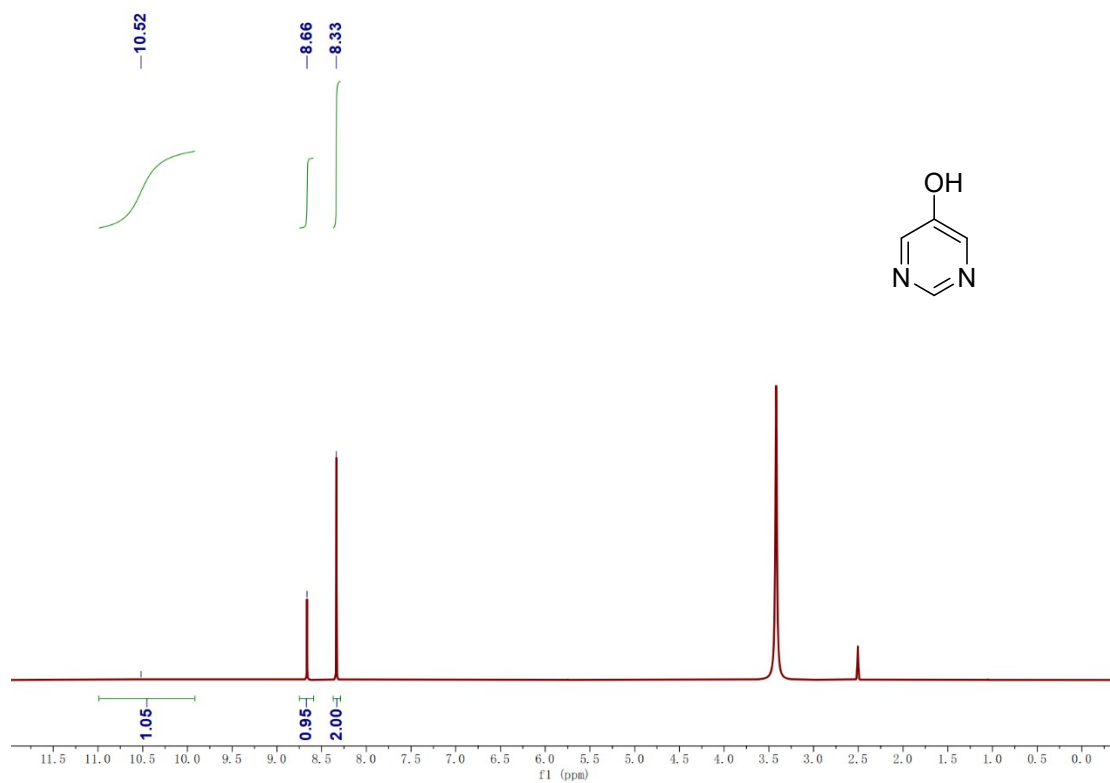

**Fig. S61**  $^1\text{H}$  NMR spectrum of **4k** in  $\text{DMSO-}d_6$ .

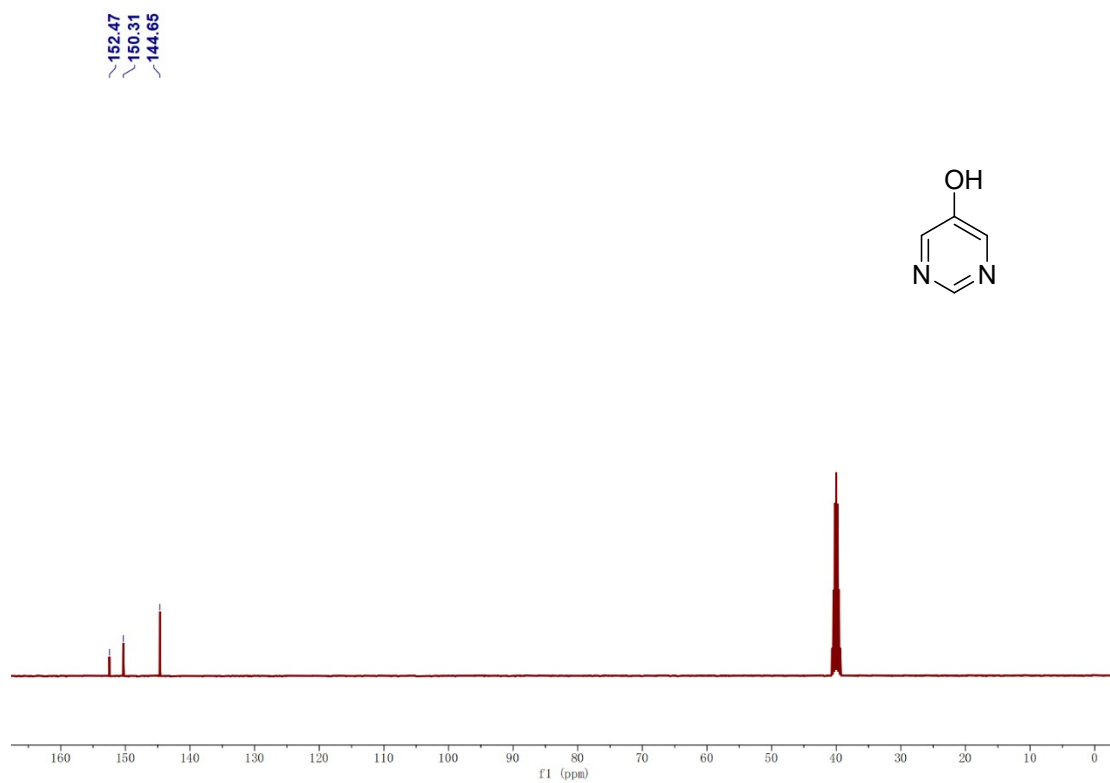

**Fig. S62**  $^{13}\text{C}$  NMR spectrum of **4k** in  $\text{DMSO-}d_6$ .

## Reference:

- [1] C.-J. Wu, X.-Y. Li, T.-R. Li, M.-Z. Shao, L.-J. Niu, X.-F. Lu, J.-L. Kan, Y. Geng and Y.-B. Dong, *J. Am. Chem. Soc.* **2022**, *144*, 18750-18755.
- [2] S. Bierbaumer, L. Schmermund, A. List, C. K. Winkler, S. M. Glueck and W. Kroutil, *Angew. Chem., Int. Ed.* **2022**, *61*, e202117103.
- [3] P. J. Gilissen, X. Chen, J. De Graaf, P. Tinnemans, B. L. Feringa, J. A. A. W. Elemans and R. J. M. Nolte, *Chem. Eur. J.* **2023**, *29*, e202203539.
- [4] F. Wang, L. Feng, S. Dong, X. Liu and X. Feng, *Chem. Commun.* **2020**, *56*, 3233-3236.
- [5] E. Skolia, P. L. Gkizis, N. F. Nikitas and C. G. Kokotos, *Green Chem.* **2022**, *24*, 4108-4118.
- [6] H. Li, X. Li, J. Zhou, W. Sheng and X. Lang, *Chinese Chem Lett* **2022**, *33*, 3733-3738.
- [7] H. Zhang, C. Zhou, Y. Zheng and X. Zhang, *Green Chem.* **2021**, *23*, 8878-8885.
- [8] G.-B. Wang, Y.-J. Wang, J.-L. Kan, K.-H. Xie, H.-P. Xu, F. Zhao, M.-C. Wang, Y. Geng and Y.-B. Dong, *J. Am. Chem. Soc.* **2023**, *145*, 4951-4956.
- [9] Z.-X. He, B. Yin, X.-H. Li, X.-L. Zhou, H.-N. Song, J.-B. Xu and F. Gao, *J Org Chem* **2023**, *88*, 4765-4769.
- [10] N. Noto, A. Yada, T. Yanai and S. Saito, *Angew. Chem., Int. Ed.* **2023**, *62*, e202219107.
- [11] M. Karthik and P. Suresh, *ACS Sustainable Chem. Eng.* **2019**, *7*, 9028-9034.
- [12] E. Rodrigo, R. Wiechert, M. W. Walter, W. Braje and H. Geneste, *Green Chem.* **2022**, *24*, 1469-1473.
